# Supplementary material for: SnO nanoparticles as an efficient catalyst for the one-pot synthesis of chromeno[2,3-b]pyridines and 2-amino-3,5-dicyano-6-sulfanyl pyridines
Source: Royal Society of Chemistry journal article supplement (doi:10.1039/c4ra04769a), 2014-01-01

### Supplementary data

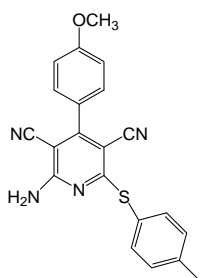

**2-Amino-4-(4-methoxyphenyl)-6-(p-tolylthio)pyridine-3,5-dicarbonitrile (5a).** Yellow solid; mp 229–231 °C; FT-IR (KBr): ( $\nu_{\max}/\text{cm}^{-1}$ ): 3462, 3332, 2218, 1632, 1544;  $^1\text{H}$  NMR (400 MHz,  $\text{CDCl}_3$ ):  $\delta$  (ppm) 2.43 (s, 3H,  $\text{CH}_3$ ), 3.88 (s, 3H,  $\text{OCH}_3$ ), 5.47 (s, 2H,  $\text{NH}_2$ ), 7.04–7.06 (d, 2H,  $J = 8$  Hz, Ar-H), 7.28 (d, 2H, Ar-H), 7.42 (d, 2H,  $J = 7.8$  Hz, ArH), 7.51–7.53 (d, 2H,  $J = 8$  Hz, ArH);  $^{13}\text{C}$  NMR (100 MHz,  $\text{CDCl}_3$ ):  $\delta$  (ppm) 21.4, 55.6, 87.1, 94.8, 114.3, 115.6, 124.1, 126.1, 130.3, 130.4, 135.3, 139.7, 158.2, 160.2, 161.2, 165.1, 167.4; **MS (EI, 70 eV):  $m/z$  372 ( $\text{M}^+$ )**, Anal. Calcd for  $\text{C}_{21}\text{H}_{16}\text{N}_4\text{OS}$ : C, 67.72; H, 4.33; N, 15.04%. Found: C, 67.62; H, 4.39; N, 15.14%.

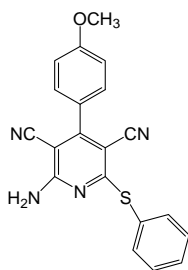

**2-Amino-4-(4-methoxyphenyl)-6-(phenylthio)pyridine-3,5-dicarbonitrile (5b).** Yellow solid; mp 240–242 °C; FT-IR (KBr): ( $\nu_{\max}/\text{cm}^{-1}$ ): 3438, 3329, 2217, 1640, 1545;  $^1\text{H}$  NMR (400 MHz,  $\text{CDCl}_3$ ):  $\delta$  (ppm) 3.86 (s, 3H,  $\text{OCH}_3$ ), 6.81 (s, 2H,  $\text{NH}_2$ ), 7.04 (d, 2H,  $J = 7.6$  Hz, Ar-H), 7.42–7.51 (m, 5H, Ar-H), 7.54 (d, 2H,  $J = 7.6$  Hz, Ar-H),  $^{13}\text{C}$  NMR (100 MHz,  $\text{CDCl}_3$ ):  $\delta$  (ppm) 55.5, 86.3, 93.6, 114.2, 115.6, 129.3, 129.6, 130.8, 131.1, 133.2, 135.7, 157.6, 158.9, 159.9, 161.4, 166.9; **MS (EI, 70 eV):  $m/z$  358 ( $\text{M}^+$ )**, Anal. Calcd for  $\text{C}_{20}\text{H}_{14}\text{N}_4\text{OS}$ : C, 67.02, H, 3.94; N, 15.63 %. Found: C, 67.11; H, 3.85; N, 15.52%.

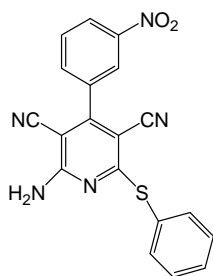

**2-Amino-4-(3-nitrophenyl)-6-(phenylsulfanyl)-3,5-pyridine dicarbonitrile (5c).** Yellow solid, mp 218–220 °C; FT-IR (KBr): ( $\nu_{\max}/\text{cm}^{-1}$ ): 3447, 3315, 2218, 1626, 1523, 1349;  $^1\text{H}$  NMR (400 MHz,  $\text{CDCl}_3$ ):  $\delta$  (ppm) 5.38 (s, 2H,  $\text{NH}_2$ ), 7.50–7.57 (m, 5H, Ar-H), 7.38–7.72 (m, 3H, Ar-H), 8.44 (s, 1H, ArH);  $^{13}\text{C}$  NMR (100 MHz,  $\text{CDCl}_3$ ):  $\delta$  (ppm) 87.4, 95.9, 114.8, 115.2, 127.1, 128.4, 129.3, 129.9, 131.2, 133.2, 135.8, 136.1, 137.2, 158.4, 159.3, 164.1, 169.5; MS (EI, 70 eV):  $m/z$  373 ( $\text{M}^+$ ), Anal. Calcd for  $\text{C}_{19}\text{H}_{11}\text{N}_5\text{O}_2\text{S}$ : C, 61.12; H, 2.97; N, 18.76%. Found: C, 61.21; H, 2.91; N, 18.68%. HR MS calc. for  $\text{C}_{19}\text{H}_{11}\text{N}_5\text{O}_2\text{S}$ : 373.0633, found: 373.0631;

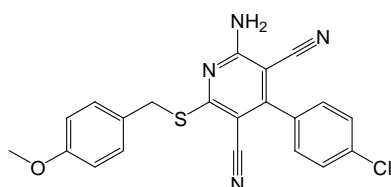

**2-Amino-4-(4-chlorophenyl)-6-((4-methoxybenzyl)thio)-3,5-pyridinedicarbonitrile (5d).** Yellow solid, mp 237–239 °C; FT-IR (KBr): ( $\nu_{\max}/\text{cm}^{-1}$ ): 3322, 2214, 1626, 1543, 1482, 1243;  $^1\text{H}$  NMR (400 MHz,  $\text{DMSO}-d_6$ ):  $\delta$  (ppm) 3.71 (s, 3H,  $\text{OCH}_3$ ), 4.43 (s, 2H,  $\text{CH}_2$ ), 6.84–6.86 (d,  $J=8.4$ , 2H, Ar-H), 7.41–7.43 (d,  $J=8.2$ , 2H, Ar-H), 7.54–7.56 (d,  $J=8.4$ , 2H, Ar-H), 7.61–7.63 (d,  $J=8.2$ , 2H, Ar-H), 8.06 (s, 2H,  $\text{NH}_2$ ).  $^{13}\text{C}$  NMR (100 MHz,  $\text{DMSO}-d_6$ ):  $\delta$  (ppm) 33.3, 55.5, 86.3, 93.6, 114.2, 114.9, 115.6, 129.3, 129.6, 130.8, 131.1, 133.2, 135.7, 157.6, 158.9, 159.9, 169.8 MS (EI, 70 eV):  $m/z$  406 ( $\text{M}^+$ ), Anal. Calcd for  $\text{C}_{21}\text{H}_{15}\text{ClN}_4\text{OS}$ : C, 61.99; H, 3.72; N, 13.77%. Found: C, 61.83; H, 3.80; N, 13.86%.

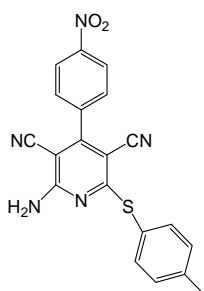

**2-Amino-4-(4-nitrophenyl)-6-(p-tolylthio)pyridine-3,5-dicarbonitrile (5e).** Yellow solid, mp 301–303 °C; FT-IR (KBr): ( $\nu_{\max}/\text{cm}^{-1}$ ): 3472, 3332, 3218, 2215, 1626, 1541, 1509, 1344, 1262,  $^1\text{H}$  NMR (400 MHz,  $\text{CDCl}_3$ ):  $\delta$  (ppm) 2.40 (s, 3H,  $\text{CH}_3$ ), 5.50 (s, 2H,  $\text{NH}_2$ ), 7.26–7.28 (d,  $J=7.6$ , 2H, Ar-H), 7.43–7.45 (d,  $J=7.8$ , 2H, Ar-H), 7.66–7.68 (d,  $J=7.6$ , 2H, Ar-H), 8.39–8.41 (d,  $J=7.8$ , 2H, Ar-H);  $^{13}\text{C}$  NMR (100 MHz,  $\text{CDCl}_3$ ):  $\delta$  (ppm) 18.9, 86.8, 96.2, 115.1, 116.9, 125.3, 131.3, 132.9, 134.1, 134.9, 135.5, 136.2, 137.3, 156.1, 158.2, 165.1. MS (EI, 70 eV):  $m/z$  387 ( $\text{M}^+$ ), Anal. Calcd for  $\text{C}_{20}\text{H}_{13}\text{N}_5\text{O}_2\text{S}$ : C, 62.01; H, 3.38; N, 18.08%. Found: C, 61.83; H, 3.26; N, 18.15%.

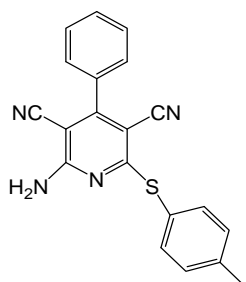

**2-Amino-4-phenyl-6-(*p*-tolylthio) pyridine-3,5-dicarbonitrile (5f).** Yellow solid, mp 248–250 °C; FT-IR (KBr): ( $\nu_{\max}/\text{cm}^{-1}$ ): 3446, 3314, 2219, 1627, 1522;  $^1\text{H}$  NMR (400 MHz,  $\text{DMSO}-d_6$ ):  $\delta$  (ppm) 2.34 (s, 3H,  $\text{CH}_3$ ), 7.27 (d,  $J = 7.9$ , 2H, Ar-H), 7.45 (d, 2H,  $J = 7.9$ , Ar-H), 7.49 (m, 5H, Ar-H), 7.80 (s, 2H,  $\text{NH}_2$ );  $^{13}\text{C}$  NMR (100 MHz,  $\text{DMSO}-d_6$ ):  $\delta$  (ppm) 21.4, 87.2, 95.7, 114.8, 115.2, 123.5, 128.4, 129.9, 130.1, 130.9, 133.2, 135.6, 140.3, 158.3, 159.3, 169.5, **MS (EI, 70 eV):  $m/z$  342 ( $\text{M}^+$ )**, Anal. Calcd for  $\text{C}_{20}\text{H}_{14}\text{N}_4\text{S}$ : C, 70.15; H, 4.12; N, 16.36%. Found: C, 70.09; H, 4.21; N, 16.31%. **HR MS calc. for  $\text{C}_{20}\text{H}_{14}\text{N}_4\text{S}$ : 342.0939; found: 342.0949;**

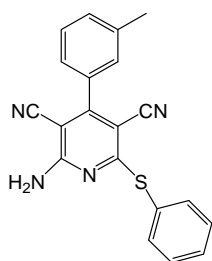

**2-amino-6-(phenylthio)-4-*m*-tolylpyridine-3,5-dicarbonitrile (5g).** Colorless solid; mp 278–280 °C, IR (KBr) ( $\nu_{\max}/\text{cm}^{-1}$ ): 3420, 3339, 3219, 2214, 1621;  $^1\text{H}$  NMR (400 MHz,  $\text{DMSO}-d_6$ ):  $\delta$  (ppm)  $\delta$  2.44 (s, 3H), 7.32–7.74 (m, 6H), 7.45–7.55 (m, 3H) 7.63 (s, 2H,  $\text{NH}_2$ ),  $^{13}\text{C}$  NMR (100 MHz,  $\text{DMSO}-d_6$ ):  $\delta$  (ppm) 15.1, 87.6, 94.1, 115.9, 116.0, 126.0, 128.1, 129.7, 130.1, 130.3, 130.5, 131.3, 133.5, 135.6, 142.7, 158.6, 160.6. **MS (EI, 70 eV):  $m/z$  342 ( $\text{M}^+$ )**, Anal. Calcd for  $\text{C}_{20}\text{H}_{14}\text{N}_4\text{S}$ : C, 70.15; H, 4.12; N, 16.36%. Found: C, 70.18; H, 4.15; N 16.32%.

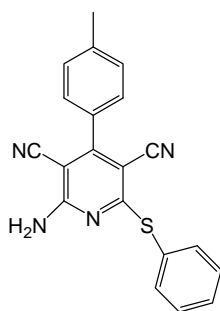

**2-Amino-6-phenylsulfanyl-4-*p*-tolyl-pyridine-3,5-dicarbonitrile (5h)** Colourless solid, mp 206–207 °C, IR (KBr) ( $\nu_{\max}/\text{cm}^{-1}$ ): 3441, 3339, 3216, 2214, 1627, 1544, 1522, 1265;  $^1\text{H}$  NMR (400 MHz,  $\text{DMSO}-d_6$ ):  $\delta$  (ppm) 2.52 (s, 3H), 7.33–7.75 (m, 6H), 7.46–7.55 (m, 3H), 7.63 (s, 2H,  $\text{NH}_2$ ),  $^{13}\text{C}$  NMR (100 MHz,  $\text{DMSO}-d_6$ ):  $\delta$  (ppm) 14.9, 87.6, 94.1, 115.9, 116.0, 126.0, 126.2, 128.1, 129.7, 130.1, 130.3, 130.5, 135.6, 142.7, 158.6, 160.6. **MS (EI, 70 eV):  $m/z$  342 ( $\text{M}^+$ )**, Anal. Calcd for  $\text{C}_{20}\text{H}_{14}\text{N}_4\text{S}$ : C, 70.15; H, 4.12; N, 16.36%. Found: C, 70.17; H, 4.18; N, 16.39%.

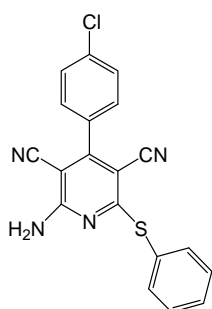

**2-Amino-4-(4-chlorophenyl)-6-phenylsulfanylpyridine-3,5-dicarbonitrile (5i)** Colourless solid, mp 221-222°C, IR (KBr) ( $\nu_{\max}/\text{cm}^{-1}$ ): 3487, 3344, 3222, 2926, 2214, 1633, 1545;  $^1\text{H}$  NMR (400 MHz, DMSO- $d_6$ ):  $\delta$  (ppm) 7.45–7.50 (m, 3H, Ar-H), 7.57 (d, 2H,  $J=8.0\text{Hz}$ , Ar-H), 7.59 (d, 2H,  $J=8.0\text{Hz}$ , Ar-H), 7.64 (d, 2H,  $J=8.0\text{Hz}$ , Ar-H) 7.83 (s, 2H,  $\text{NH}_2$ );  $^{13}\text{C}$  NMR (100 MHz, DMSO- $d_6$ ):  $\delta$  (ppm) 87.5, 93.7, 115.2, 115.5, 127.3, 129.2, 129.5, 129.8, 130.8, 133.1, 135.2, 135.7, 157.8, 159.9, 166.6. **MS (EI, 70 eV):**  $m/z$  362 ( $\text{M}^+$ ), Anal. Calcd for  $\text{C}_{19}\text{H}_{11}\text{ClN}_4\text{S}$ : C, 62.89; H, 3.06; N, 15.44; S, 8.84 %. Found: C, 62.85; H, 3.11; N 15.48 %. **HRMS  $m/z$ (ESI) calcd for  $\text{C}_{19}\text{H}_{12}\text{N}_4\text{SCl}$  ( $\text{M}+\text{H}$ ) $^+$  363.0471, found 363.0481.**

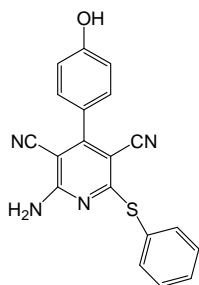

**2-Amino-4-(4-hydroxy-phenyl)-6-phenylsulfanyl-pyridine-3,5-dicarbonitrile (5j)** Colourless solid, mp 315-317°C, IR (KBr) ( $\nu_{\max}/\text{cm}^{-1}$ ): 3648, 3498, 3367, 3237, 2222, 2217, 1632;  $^1\text{H}$  NMR (400 MHz, DMSO- $d_6$ ):  $\delta$  (ppm)  $\delta$  6.94 (d,  $J=8.5\text{ Hz}$ , 2H), 7.39 (d,  $J=8.5\text{ Hz}$ , 2H), 7.52 (m, 3H), 7.60 (m, 2H), 7.69 (s, 2H), 10.05 (bs, 1H, OH);  $^{13}\text{C}$  NMR (100 MHz, DMSO- $d_6$ ):  $\delta$  (ppm) 93.7, 96.9, 115.6, 115.9, 116.0, 124.5, 127.5, 129.8, 130.1, 130.7, 135.2, 159.1, 159.8, 160.3, 166.5; **MS (EI, 70 eV):**  $m/z$  344 ( $\text{M}^+$ ), Anal. Calcd for  $\text{C}_{19}\text{H}_{12}\text{N}_4\text{OS}$ : C, 66.26; H, 3.51; N, 16.27%. Found: C, 66.10; H, 3.62; N, 16.22 %.

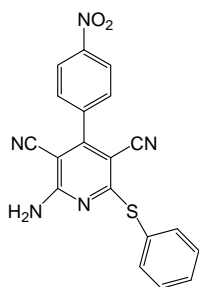

**2-Amino-4-(4-nitro-phenyl)-6-phenylsulfanyl-pyridine-3,5-dicarbonitrile (5k)** Colourless solid, mp 289-290 °C, IR (KBr) ( $\nu_{\max}/\text{cm}^{-1}$ ): 3407, 3328, 3235, 2228, 2214, 1645, 1555;  $^1\text{H}$  NMR (400 MHz, DMSO- $d_6$ ):  $\delta$  (ppm) 7.47-7.49 (m, 3H), 7.56-7.59 (m, 2H), 7.85 (d,  $J=8.5\text{ Hz}$ , 2H), 7.91 (s, 2H,  $\text{NH}_2$ ), 8.39 (d,  $J=8.5\text{ Hz}$ , 2H);  $^{13}\text{C}$  NMR (100 MHz, DMSO- $d_6$ ):  $\delta$  (ppm) 87.2, 93.3, 114.9, 115.3, 124.2, 127.2, 129.8, 130.1, 130.5, 135.1, 140.5, 148.9, 157.0, 159.8, 166.5; **MS (EI, 70 eV):**  $m/z$  373 ( $\text{M}^+$ ), Anal. Calcd for  $\text{C}_{19}\text{H}_{11}\text{N}_5\text{O}_2\text{S}$ : C, 61.12; H, 2.97; N, 18.76% Found: C, 61.05; H, 2.78; N, 18.91%.

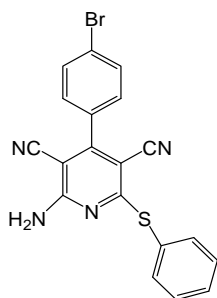

**2-Amino-4-(4-bromophenyl)-6-phenylsulphanylpyridine-3,5-dicarbonitrile (5l)** Colourless solid, mp 255-257 °C; IR (KBr) ( $\nu_{\max}/\text{cm}^{-1}$ ): 3442, 3338, 3222, 2219, 1629, 1555, 1531, 1459;  $^1\text{H}$  NMR (400 MHz,  $\text{DMSO-}d_6$ ):  $\delta$  (ppm) 7.54–7.62 (m, 5H), 7.80–7.82 (m, 4H), 7.87 (s, 2H,  $\text{NH}_2$ );  $^{13}\text{C}$  NMR (100 MHz,  $\text{DMSO-}d_6$ ):  $\delta$  (ppm) 85.6, 92.1, 113.5, 113.4, 120.6, 125.9, 127.1, 128.0, , 129.5, 131.9, 133.5, 134.3, 158.3, 159.8, 166.5; MS (EI, 70 eV):  $m/z$  405 ( $\text{M}^+$ ), Anal. Calcd for  $\text{C}_{19}\text{H}_{11}\text{BrN}_4\text{S}$ : C, 56.03; H, 2.72; N, 13.76; S 7.87%. Found: C, 56.08; H, 2.78; N 13.68, S 7.81 %. HRMS calc. for  $\text{C}_{19}\text{H}_{11}\text{BrN}_4\text{S}$ : 405.9888, found: 405.9885.

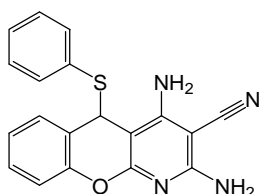

**2,4-Diamino-5-phenylsulfanyl-5H-chromeno [2,3-b] pyridine- 3-carbonitrile(6a).** Yellow solid, mp 220-222°C, IR (KBr) ( $\nu_{\max}/\text{cm}^{-1}$ ): 3355, 3429, 2203, 1400-1623;  $^1\text{H}$  NMR (400 MHz,  $\text{DMSO-}d_6$ ):  $\delta$  5.73 (s, 1H), 6.50 (2H, s), 6.74-6.78 (3H, m), 6.94 (s, 2H), 7.05-7.11 (3H, m), 7.15-7.30 (m, 3H);  $^{13}\text{C}$  NMR (100MHz,  $\text{DMSO-}d_6$ ):  $\delta$  (ppm) 43.12, 70.8, 86.90, 116.01, 116.5, 121.5, 123.9, 128.60, 128.64, 129.50, 129.70, 134.2, 137.7, 150.90, 156.40, 159.7, 160.90. MS (EI, 70 eV):  $m/z$  346 ( $\text{M}^+$ ), Anal. Calcd. For  $\text{C}_{19}\text{H}_{14}\text{N}_4\text{OS}$ : C, 65.88; H, 4.074; N, 16.17; S, 9.26 %. Found C 65. 82, H 4.09, N 16.07%. HRMS  $m/z$ (ESI) calcd for  $\text{C}_{19}\text{H}_{15}\text{N}_4\text{OS}$  ( $\text{M}+\text{H}^+$ ) 347.0966, found 347.0958.

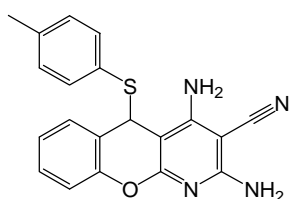

**2,4-Diamino-5-(4-methylphenylsulfanyl)-5H-chromeno[2,3-b] pyridine-3-carbonitrile (6b).** Yellow solid, mp 223–225 °C; IR (KBr) ( $\nu_{\max}/\text{cm}^{-1}$ ): 3457, 3349, 2198, 1400-1623.  $^1\text{H}$  NMR (400 MHz,  $\text{DMSO-}d_6$ ):  $\delta$  2.19 (s, 3H), 5.66 (s, 1H), 6.46 (br s, 2H), 6.61 (d,  $J=7.9\text{Hz}$ , 2H), 6.79 (d,  $J=7.9\text{Hz}$ , 1H), 6.90 (m, 4H), 7.11; (d,  $J=6.8\text{Hz}$ , 1H), 7.19 (d,  $J=7.3\text{Hz}$ , 2H).  $^{13}\text{C}$  NMR (100MHz,  $\text{DMSO-}d_6$ ):  $\delta$  (ppm) 21.2, 43.11, 70.8, 86.3, 115.7, 116.4, 121.8, 123.6, 127.0, 128.2, 128.6, 129.8, 136.9, 138.3, 151.33, 156.3, 160.08, 160.25 MS (EI, 70 eV):  $m/z$  360 ( $\text{M}^+$ ), Anal. Calcd. For  $\text{C}_{20}\text{H}_{16}\text{N}_4\text{OS}$ : C 66.64, H 4.47, N 15.54, S 8.90%. Found C 66.59, H 4.51, N 15.48 %. HR MS ESI [ $\text{M}+\text{H}^+$ ] calcd. for  $\text{C}_{20}\text{H}_{17}\text{N}_4\text{OS}$  361.1123; found 361.1132.

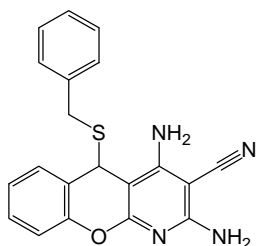

**2,4-Diamino-5-(benzylthio)-5H-chromeno[2,3-b]pyridine-3-carbonitrile (6c).** Yellow solid, mp 173–175 °C; IR (KBr) ( $\nu_{\max}/\text{cm}^{-1}$ ): 3377, 3439, 2200, 1400, 1605;  $^1\text{H}$  NMR (400 MHz, DMSO- $d_6$ ):  $\delta$  3.49 (ABq, 2H,  $J=12\text{Hz}$ ), 5.48 (1H), 6.55 (bs, 2H), 6.83 (bs, 2H), 7.03–7.21 (m, 7H), 7.33 (m, 2H);  $^{13}\text{C}$  NMR (100 MHz, DMSO- $d_6$ ):  $\delta$  (ppm) 35.02, 44.01, 70.90, 87.01, 117.6, 118.3, 119.3, 122.8, 124.2, 124.3, 129.6, 133.2, 133.3, 136.6, 143.7, 152.9, 159.9, 160.2. **MS (EI, 70 eV):  $m/z$  360 ( $M^+$ ),** Anal. Calcd For  $\text{C}_{20}\text{H}_{16}\text{N}_4\text{OS}$ : C, 66.64; H, 4.47; N, 15.54; Found C, 66.48; H, 4.58; N, 15.39%. **HRMS  $m/z$  (ESI) calcd for  $\text{C}_{20}\text{H}_{17}\text{N}_4\text{OS}$  ( $M+H$ ) $^+$  361.1123, found 361.1129.**

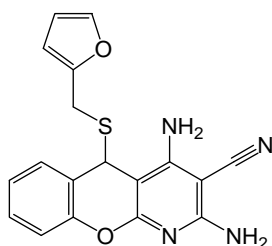

**5-(furan-2-yl)methylthio-2,4-diamino-5H-chromeno[2,3-b]pyridine-3-carbonitrile (6d).** Yellow solid, mp 200–201 °C; IR (KBr) ( $\nu_{\max}/\text{cm}^{-1}$ ): 3386, 3440, 2203, 1397, 1612;  $^1\text{H}$  NMR (400 MHz, DMSO- $d_6$ ):  $\delta$  3.51 (ABq, 2H,  $J=12\text{Hz}$ ), 5.46 (1H), 5.99 (1H), 6.23 (s, 1H), 6.55 (bs, 2H), 6.79 (bs, 2H), 7.10 (d, 1H,  $J=8\text{Hz}$ ), 7.17 (t, 1H,  $J=8\text{Hz}$ ), 7.24 (s, 1H), 7.31 (t, 2H,  $J=8\text{Hz}$ );  $^{13}\text{C}$  NMR (100 MHz, DMSO- $d_6$ ):  $\delta$  (ppm) 25.9, 36.03, 71.0, 87.9, 107.8, 111.0, 116.5, 116.9, 129.0, 129.7, 133.8, 142.7, 149.4, 151.2, 157.1, 160.03, 160.10. **MS (EI, 70 eV):  $m/z$  350 ( $M^+$ ),** Anal. Calcd For  $\text{C}_{18}\text{H}_{14}\text{N}_4\text{O}_2\text{S}$ : C 61.70, H 4.03, N 15.99 Found C 61.62, H 4.10, N 15.91%. **HRMS  $m/z$  (ESI) calcd for  $\text{C}_{18}\text{H}_{15}\text{N}_4\text{O}_2\text{S}$  ( $M+H$ ) $^+$  351.0915, found 351.0913.**

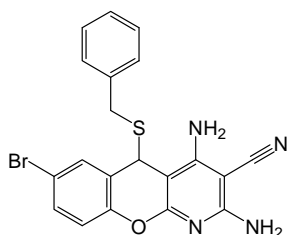

**2,4-Diamino-5-(benzylthio)-7-bromo-5H-chromeno[2,3-b]pyridine-3-carbonitrile (6e).** Yellow solid, mp 206–208 °C, IR (KBr) ( $\nu_{\max}/\text{cm}^{-1}$ ): 3315, 3441, 2189, 1403, 1653;  $^1\text{H}$  NMR (400 MHz, DMSO- $d_6$ ):  $\delta$  4.06–4.45 (ABq, 2H,  $J=12\text{Hz}$ ), 4.67 (1H), 6.48 (s, 1H), 6.88–6.90 (m, 5H), 7.37 (m, 6H);  $^{13}\text{C}$  NMR (100 MHz, DMSO- $d_6$ ):  $\delta$  (ppm) 33.34, 35.78, 71.21, 87.22, 116.46, 118.79, 120.90, 121.60, 124.41, 128.60, 129.79, 131.05, 137.53, 137.96, 148.22, 152.75, 160.44, 160.80. **MS (EI, 70 eV):  $m/z$  439 ( $M^+$ ),** Anal. Calcd For  $\text{C}_{20}\text{H}_{15}\text{N}_4\text{OSBr}$ : C 54.68, H 3.44, N 12.75 Found C 54.55, H 3.52, N 12.61%.

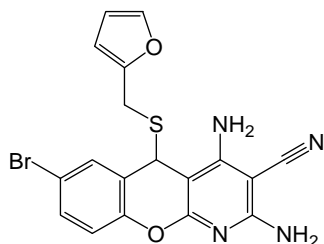

**5-((furan-2-yl)methylthio)-2,4-diamino-7-bromo-5H-chromeno[2,3-b]pyridine-3-carbonitrile (6f).** Yellow solid. mp 225–227 °C, IR (KBr)( $\nu_{\max}/\text{cm}^{-1}$ ): 3311, 3442, 2194, 1404, 1655;  $^1\text{H}$  NMR (400 MHz, DMSO- $d_6$ )  $\delta$  4.14–4.56 (ABq, 2H,  $J=12\text{Hz}$ ), 4.89 (1H), 6.34 (s, 1H), 6.46 (d,  $J=8.3\text{Hz}$ , 1H), 6.78–6.95 (m, 6H), 7.39 (d, 1H,  $J=9\text{Hz}$ ), 7.62 (d, 1H);  $^{13}\text{C}$  NMR (100 MHz, DMSO- $d_6$ )  $\delta$  (ppm) 28.64, 36.31, 54.27, 84.86, 108.77, 111.49, 116.50, 118.87, 119.41, 124.14, 125.50, 131.12, 131.89, 143.26, 148.21, 150.72, 155.24, 160.5. MS (EI, 70 eV):  $m/z$  429 ( $M^+$ ). Anal. Calcd For  $\text{C}_{18}\text{H}_{13}\text{N}_4\text{O}_2\text{SBr}$ : C 50.39, H 3.05, N 13.06 Found C 50.35, H 2.97, N 13.01%.

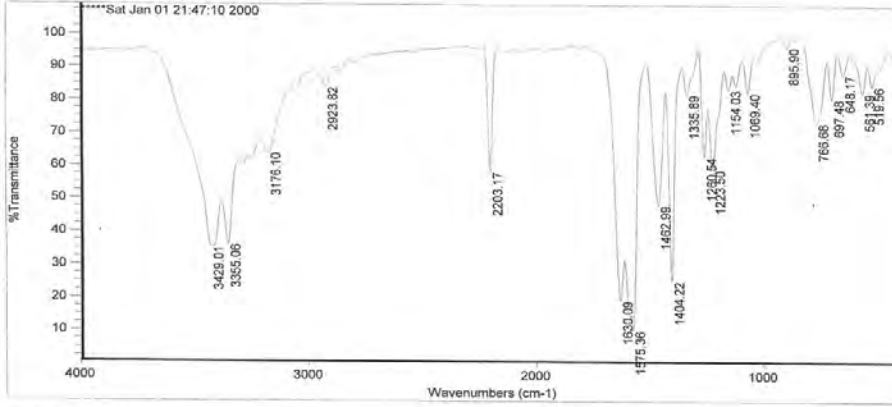

Sat Jan 01 21:51:51 2000

FIND PEAKS:

Spectrum: \*\*\*\*\*Sat Jan 01 21:47:10 2000

Region: 4000.00 400.00

Absolute threshold: 99.069

Sensitivity: 50

Peak list:

|           |         |            |        |
|-----------|---------|------------|--------|
| Position: | 1575.38 | Intensity: | 9.996  |
| Position: | 1630.09 | Intensity: | 15.224 |
| Position: | 1404.22 | Intensity: | 52.352 |
| Position: | 3428.01 | Intensity: | 28.292 |
| Position: | 3355.06 | Intensity: | 35.220 |
| Position: | 1462.99 | Intensity: | 42.114 |
| Position: | 2203.17 | Intensity: | 59.164 |

|           |         |            |        |
|-----------|---------|------------|--------|
| Position: | 895.90  | Intensity: | 98.416 |
| Position: | 648.17  | Intensity: | 88.192 |
| Position: | 519.56  | Intensity: | 84.651 |
| Position: | 2923.82 | Intensity: | 83.811 |
| Position: | 1194.03 | Intensity: | 83.388 |
| Position: | 561.39  | Intensity: | 82.513 |
| Position: | 1069.40 | Intensity: | 82.440 |
| Position: | 1335.89 | Intensity: | 81.886 |
| Position: | 697.49  | Intensity: | 80.637 |
| Position: | 766.68  | Intensity: | 73.366 |
| Position: | 3176.10 | Intensity: | 63.811 |
| Position: | 1260.54 | Intensity: | 63.026 |
| Position: | 1223.50 | Intensity: | 59.034 |



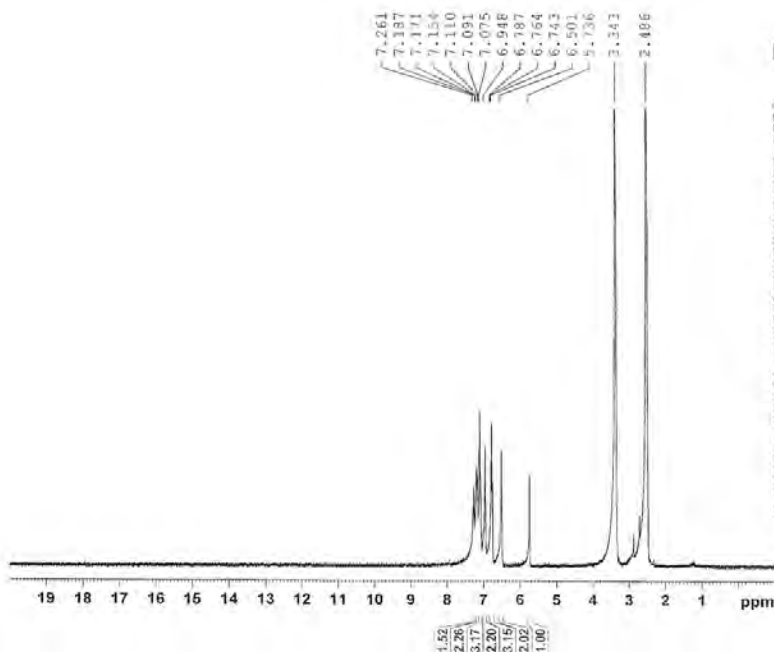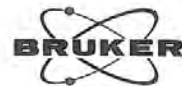

Current Data Parameters  
NAME 3H  
EXPNO 315  
PROCNO 1

F2 - Acquisition Parameters  
Date\_ 20120116  
Time 15:10  
INSTRUM spect  
PROBHD 5 mm Multinuc1  
PULPROG zg  
TD 32768  
SOLVENT HMSD  
NS 1  
DS 0  
SWH 11674.074 Hz  
FIDRES 0.35313 Hz  
AQ 1.4156276 sec  
RG 360  
RW 43.200 usec  
DE 6.00 usec  
TE 300.0 K  
D1 5.0000000 sec

===== CHANNEL f1 =====  
NUC1 1H  
P1 9.00 usec  
PL1 -0.00 dB  
SFO1 100.1324710 MHz

F2 - Processing parameters  
ST 32768  
SF 100.1306045 MHz  
HFWD EM  
SBB 0  
GB 0.30 Hz  
GB 0  
BC 1.00

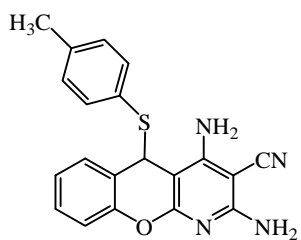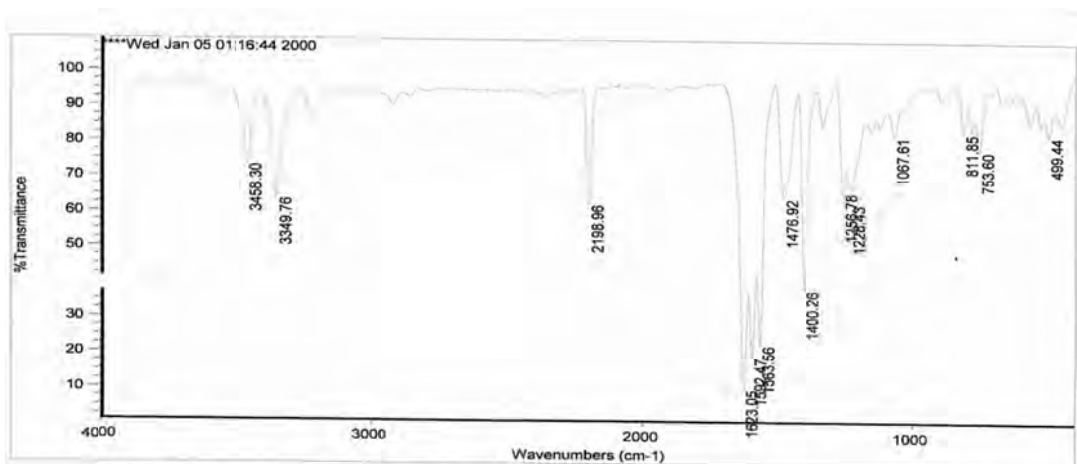

Wed Jan 05 01:19:11 2000

FIND PEAKS:

Spectrum: \*\*\*\*Wed Jan 05 01:16:44 2000  
 Region: 4000.00 400.00  
 Absolute threshold: 83.345  
 Sensitivity: 50  
 Peak list:

| Position | Intensity |
|----------|-----------|
| 1623.05  | 9.873     |
| 1592.47  | 19.015    |
| 1563.56  | 22.568    |
| 1476.92  | 64.146    |
| 1228.43  | 62.517    |
| 3349.76  | 63.590    |

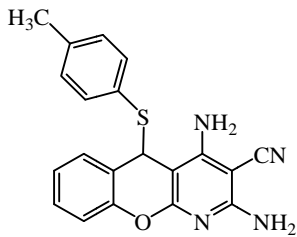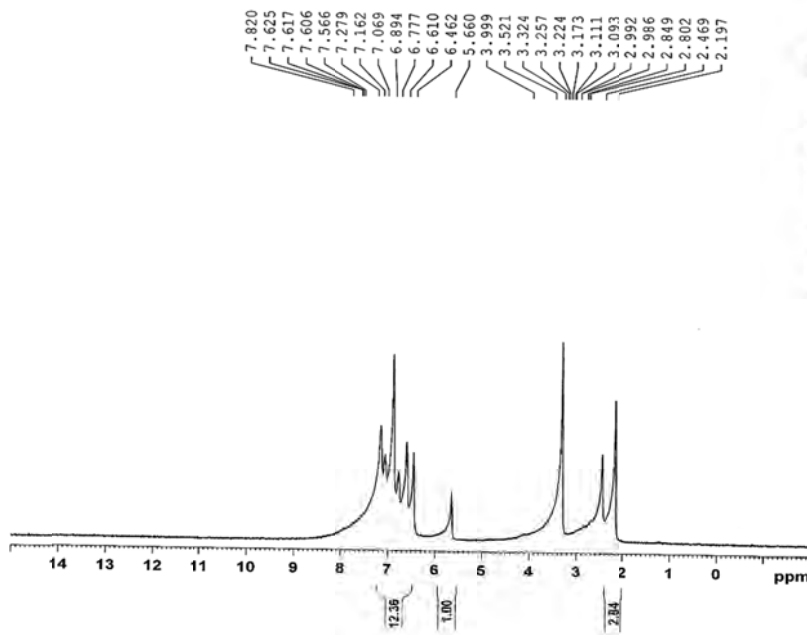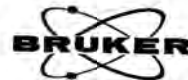

```

Current Data Parameters
NAME      3H
EXPRO    1328
PROCNO   1

F2 - Acquisition Parameters
Date     20130826
TIME     16.18
INSTRUM  spect
PROBHD   5 mm Multinucl
PULPROG  zg
TD       32768
SOLVENT  DMSO
NS       1
DS       0
SWH      11574.074 Hz
FIDRES   0.353213 Hz
AQ       1.4156276 sec
RG       181
DM       43.200 usec
DE       6.00 usec
TE       300.0 K
D1       5.0000000 sec

===== CHANNEL f1 =====
NUC1     1H
P1       3.00 usec
PL1      -6.00 dB
SFO1     400.1324710 MHz

F2 - Processing parameters
SI       32768
SF       400.1300005 MHz
WDW      EM
SSB      0
LB       0.30 Hz
GB       0
PC       1.00

```

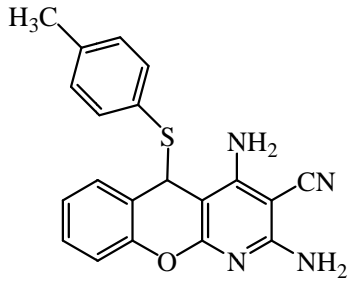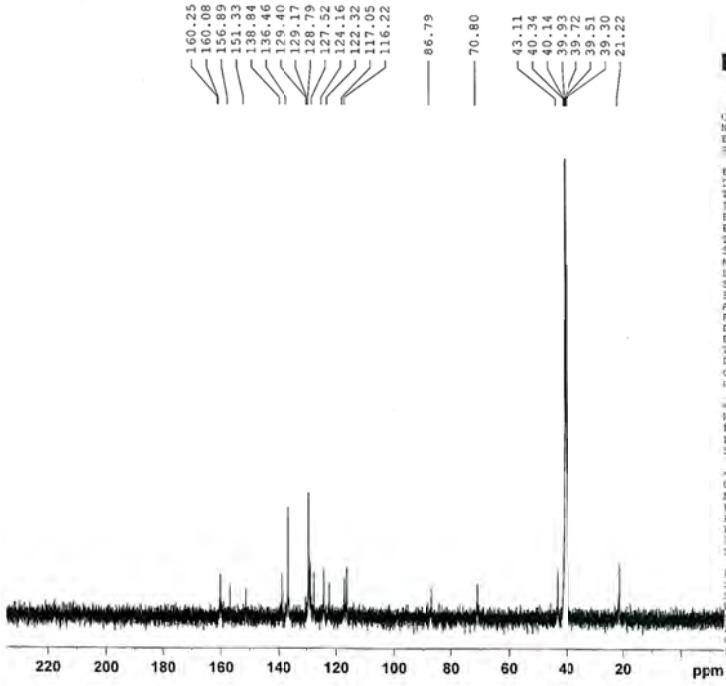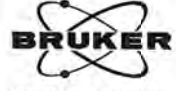

```

Current Data Parameters
NAME      Carbon13
EXPNO    2388
PROCNO   3

F2 - Acquisition Parameters
Date_    20130507
Time     16.17
INSTRUM spect
PROBHD   5 mm MaltAvuc1
PULPROG zgpg30
TD        65536
SOLVENT  DMSO
NS        500
DS        4
SWH       40404.039 Hz
FIDRES    0.616517 Hz
AQ        0.8110580 sec
RG        32768
DM        1.375 usec
DE        6.00 usec
TE        300.0 K
D1        1.00000000 sec
d11       0.00000000 sec
d12       0.00002000 sec

===== CHANNEL f1 =====
NUC1      13C
P1        7.50 usec
PL1       -2.00 dB
SFO1     100.6204965 MHz

===== CHANNEL f2 =====
CPDPRG2  waltz16
NUC2      1H
PCPD2    80.00 usec
PL2       4.00 dB
PL12     18.50 dB
PL13     18.50 dB
SFO2     400.1316005 MHz

F2 - Processing parameters
SI        32768
SF        100.6217690 MHz
WDW       EM
SSB       0
LB        1.00 Hz
GB        0
PC        1.40
  
```

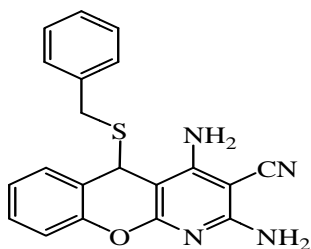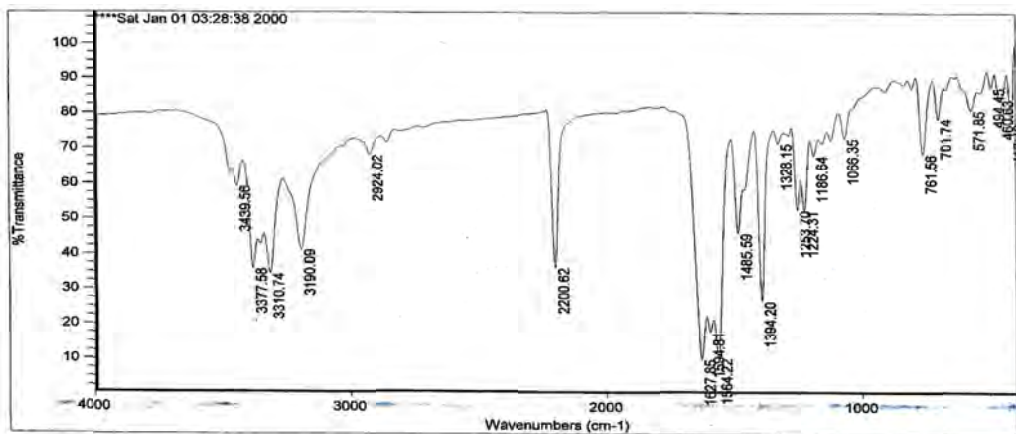

Sat Jan 01 03:31:07 2000  
 FIND PEAKS:  
 Spectrum: \*\*\*\*Sat Jan 01 03:28:38 2000  
 Region: 4000.00 400.00  
 Absolute threshold: 91.621  
 Sensitivity: 50  
 Peak list:

| Position | Intensity | Position | Intensity |
|----------|-----------|----------|-----------|
| 494.45   | 87.683    | 1186.64  | 68.130    |
| 460.63   | 84.347    | 1186.64  | 68.382    |
| 571.85   | 81.238    | 1224.31  | 62.703    |
| 701.74   | 79.825    | 1328.15  | 59.235    |
| 417.49   | 77.547    | 1394.20  | 52.658    |
| 73.313   | 73.313    | 1564.22  | 36.233    |
| 71.854   | 71.854    | 1627.85  | 9.996     |
| 1328.15  | 68.859    | 1627.85  | 9.996     |
| 761.56   | 68.859    | 1627.85  | 9.996     |
| 1186.64  | 68.382    | 1627.85  | 9.996     |
| 2824.02  | 68.130    | 1627.85  | 9.996     |
| 3439.58  | 59.235    | 1627.85  | 9.996     |
| 1224.31  | 62.703    | 1627.85  | 9.996     |
| 1224.31  | 52.658    | 1627.85  | 9.996     |
| 1224.31  | 52.658    | 1627.85  | 9.996     |
| 1485.69  | 46.129    | 1627.85  | 9.996     |
| 3190.09  | 41.136    | 1627.85  | 9.996     |

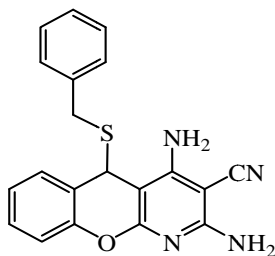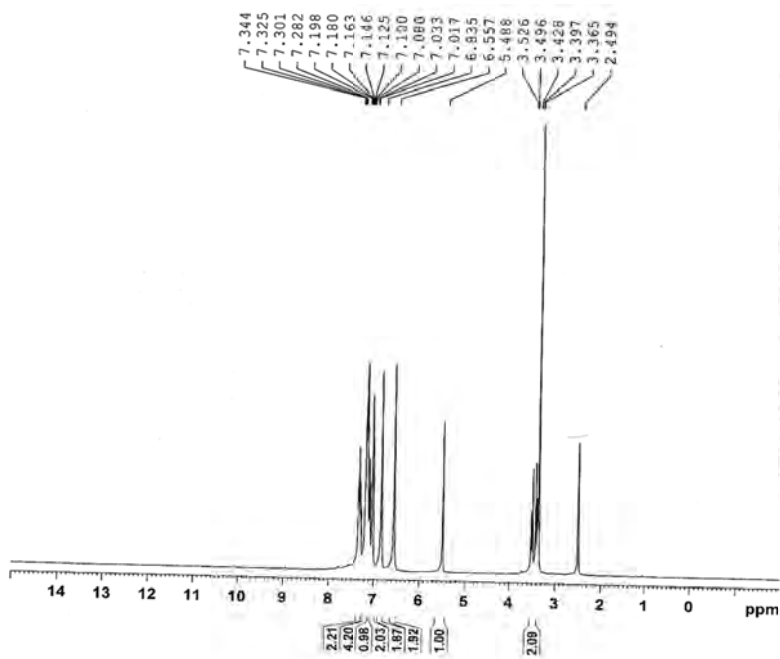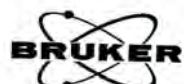

```

Current Data Parameters
NAME      3H
EXPNO    1355
PROCNO   1

F2 - Acquisition Parameters
Date_    20130828
Time     15.46
INSTRUM spect
PROBHD   5 mm Multinuc1
PULPROG zg
TD       32768
SOLVENT DMSO
NS       1
DS       0
SWH      11574.074 Hz
FIDRES   0.353213 Hz
AQ       1.4196276 sec
RG       114
EM       43.200 usec
DE       6.00 usec
TE       300.0 K
SI       5.00000000 sec

----- CHANNEL f1 -----
NUC1     1H
P1       9.00 usec
PL1     -6.00 dB
SFO1    400.1324710 MHz

F1 - Processing parameters
SI       32768
SF      400.130045 MHz
WDW     EM
SSB     0
LB      0.30 Hz
GB      0
PC      1.00
  
```

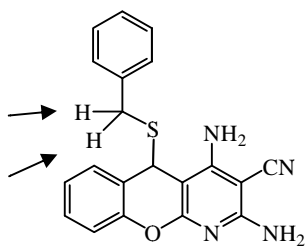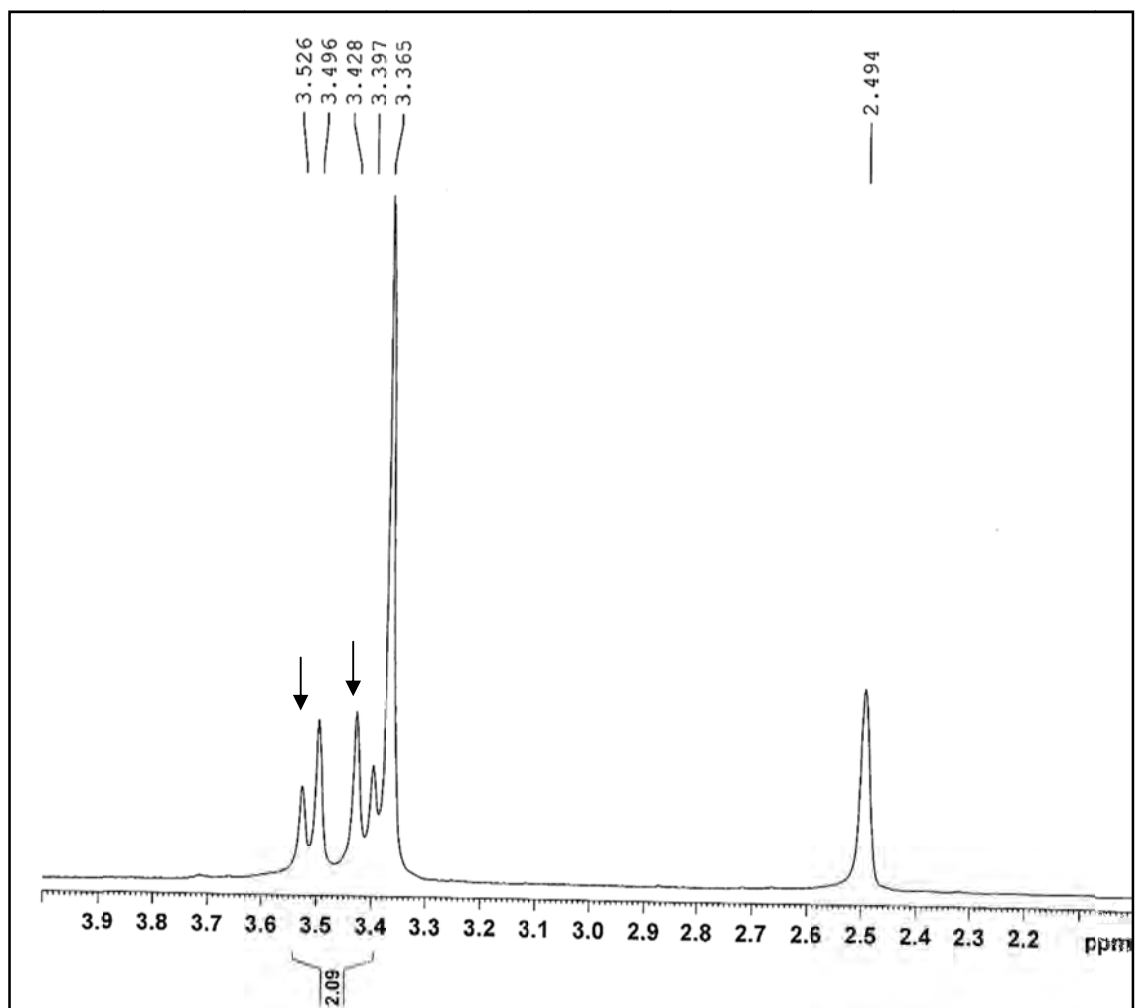

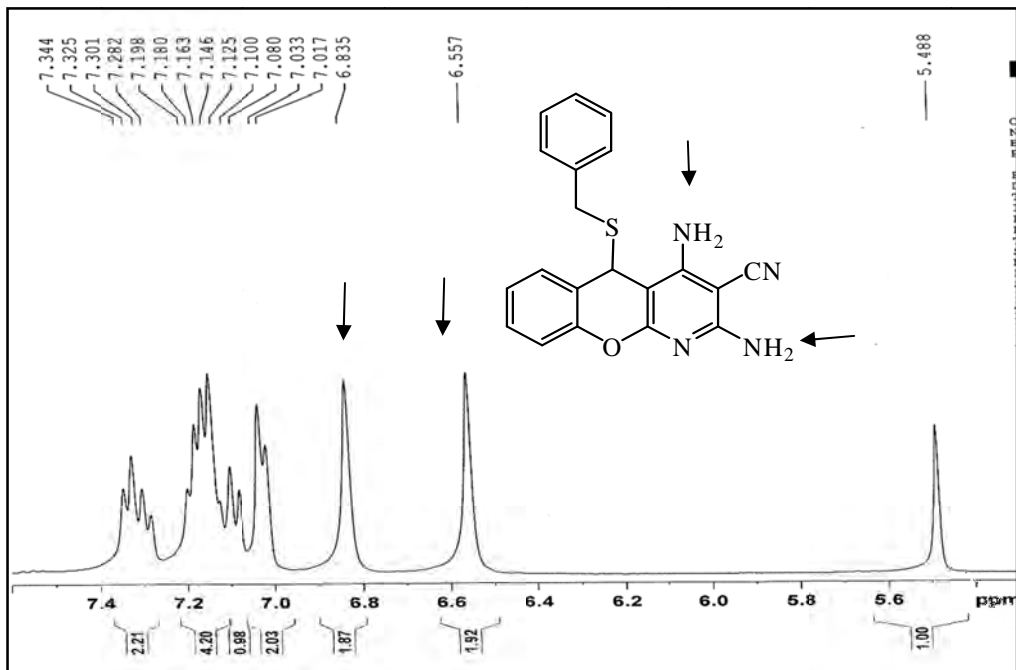





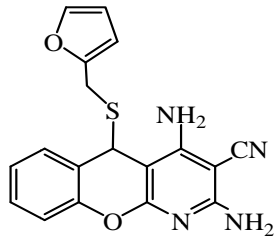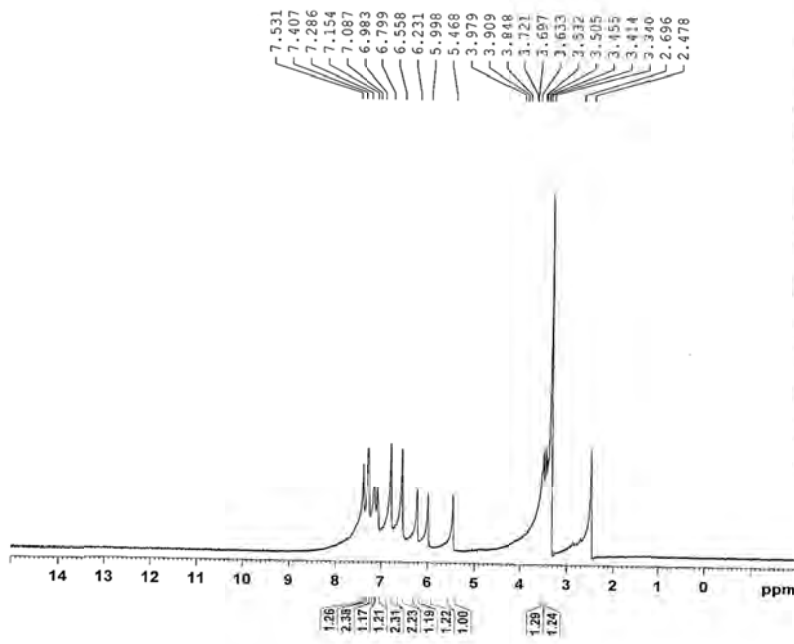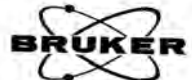

Current Data Parameters  
 NAME SU  
 EXPNO 1205  
 PROCNO 1

F2 - Acquisition Parameters  
 Date\_ 20130729  
 Time 12.31  
 INSTRUM spect  
 PROBHD 5 mm Multinuc1  
 PULPROG zgpg30  
 TD 32768  
 SOLVENT DMSO  
 NS 1  
 DS 0  
 SWH 11574.074 Hz  
 FIDRES 0.353213 Hz  
 AQ 1.4184236 sec  
 RG 181  
 SW 43.700 usec  
 DE 6.00 usec  
 TE 300.0 K  
 D1 5.00000000 sec

===== CHANNEL f2 =====  
 NUC1 1H  
 P1 9.00 usec  
 PL1 -6.00 dB  
 SFO1 400.1324710 MHz

F2 - Processing parameters  
 SI 32768  
 SF 400.130045 MHz  
 WDW EM  
 SSB 0  
 LB 0.30 Hz  
 GB 0  
 PC 1.00

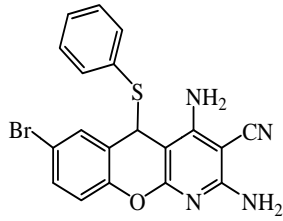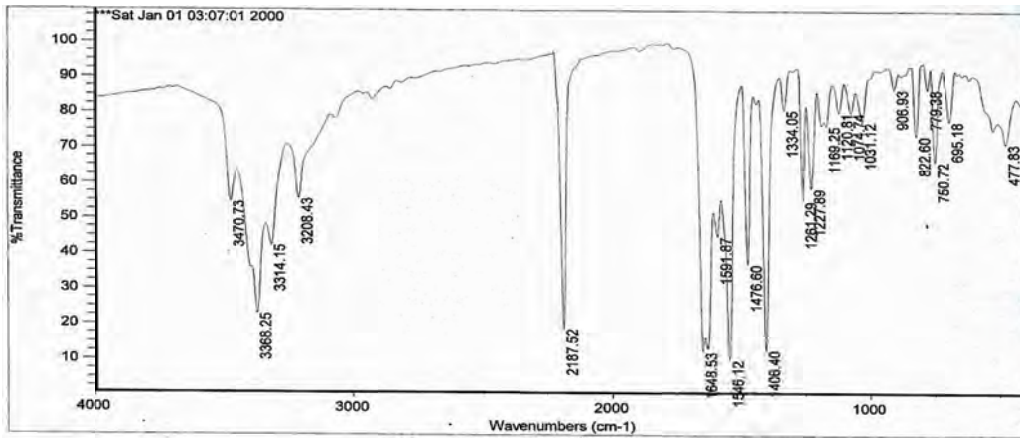

Sat Jan 01 03:09:34 2000

FIND PEAKS:

Spectrum: \*\*\*\*Sat Jan 01 03:07:01 2000

Region: 4000.00 400.00

Absolute threshold: 94.103

Sensitivity: 50

Peak list:

| Position | Intensity | Position | Intensity |
|----------|-----------|----------|-----------|
| 1591.87  | 45.033    | 1031.12  | 35.000    |
| 1546.12  | 9.931     | 1020.91  | 35.000    |
| 1476.60  | 42.146    | 1000.00  | 35.000    |
| 1408.40  | 37.361    | 906.93   | 45.000    |
| 1334.05  | 54.543    | 822.60   | 35.000    |
| 1261.28  | 55.123    | 775.35   | 35.000    |
| 1227.89  | 58.428    | 760.72   | 35.000    |
| 1189.25  | 66.628    | 695.16   | 35.000    |
| 1170.91  | 71.898    | 600.00   | 35.000    |
| 1100.00  | 75.899    | 500.00   | 35.000    |
| 1090.91  | 77.790    | 400.00   | 35.000    |
| 1031.12  | 77.844    | 300.00   | 35.000    |
| 1020.91  | 77.844    | 200.00   | 35.000    |
| 906.93   | 77.790    | 100.00   | 35.000    |
| 822.60   | 78.723    | 0.00     | 35.000    |
| 775.35   | 79.723    |          |           |
| 760.72   | 79.723    |          |           |
| 695.16   | 79.723    |          |           |
| 600.00   | 79.723    |          |           |
| 500.00   | 79.723    |          |           |
| 400.00   | 79.723    |          |           |
| 300.00   | 79.723    |          |           |
| 200.00   | 79.723    |          |           |
| 100.00   | 79.723    |          |           |
| 0.00     | 79.723    |          |           |

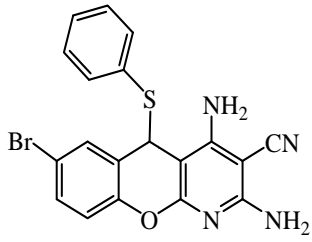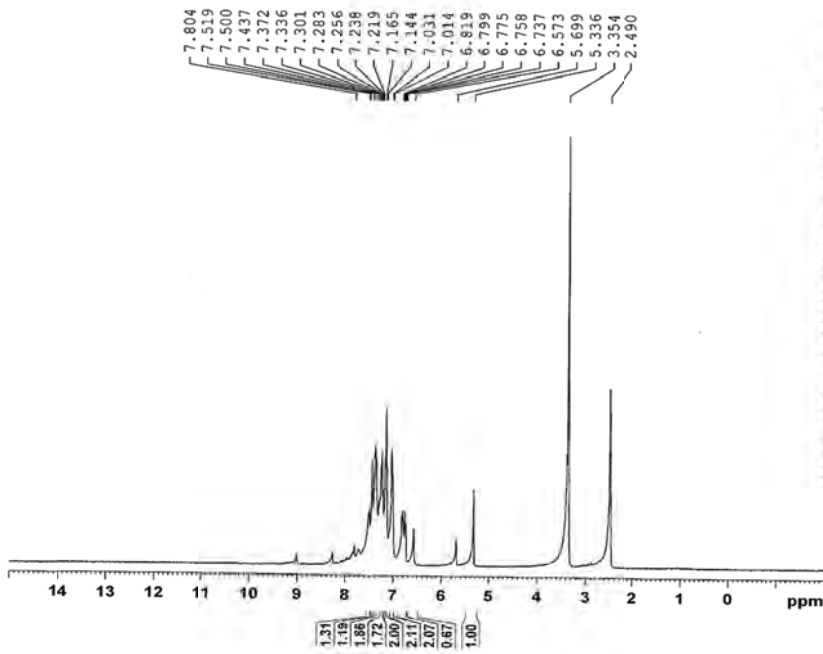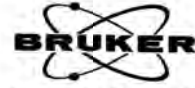

Current Data Parameters  
NAME 3H  
EXPNO 1356  
PROCNO 1

F2 - Acquisition Parameters  
Date\_ 20130828  
Time 15.52  
INSTRUM spect  
PROBHD 5 mm Multinuc1  
PULPROG zg  
TD 32768  
SOLVENT DMSO  
NS 1  
DS 0  
SWH 11574.074 Hz  
FIDRES 0.353213 Hz  
AQ 1.4156276 sec  
RG 181  
AQ 43.200 usec  
DE 6.00 usec  
TE 300.0 K  
D1 5.0000000 sec

----- CHANNEL f1 -----  
NUC1 1H  
P1 9.00 usec  
PL1 -6.00 dB  
SFO1 400.1324710 MHz

F2 - Processing parameters  
SI 32768  
SF 400.1300045 MHz  
WDW EM  
SSB 0  
LB 0.30 Hz  
GB 0  
PC 1.00

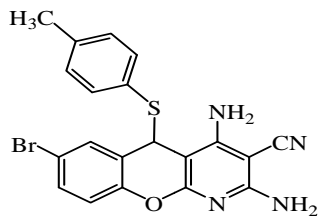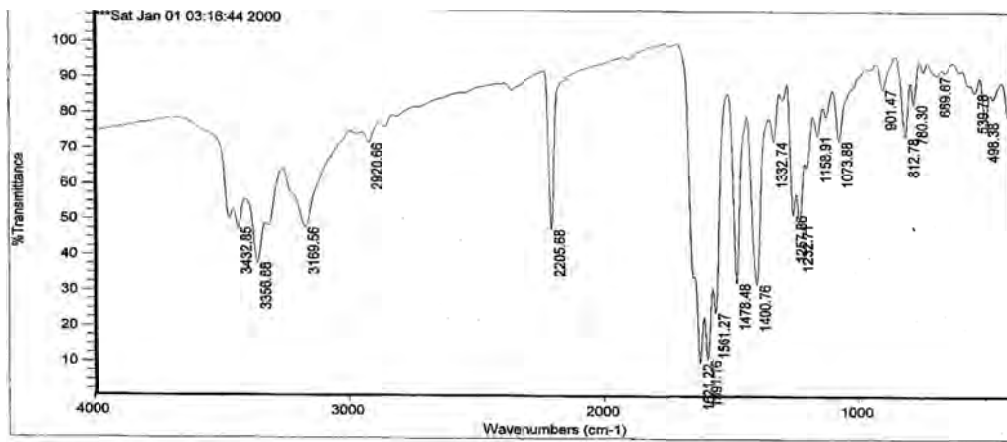

Sat Jan 01 03:21:46 2000  
 FIND PEAKS:  
 Spectrum: \*\*\* Sat Jan 01 03:16:44 2000  
 Region: 4000.00 - 400.00  
 Absolute threshold: 94.531  
 Sensitivity: 50  
 Peak list:

| Position | Intensity |
|----------|-----------|
| 3432.85  | 47.671    |
| 3356.88  | 49.420    |
| 3169.56  | 3169.56   |
| 2920.86  | 2920.86   |
| 2205.68  | 2205.68   |
| 1621.73  | 1621.73   |
| 1581.27  | 1581.27   |
| 1478.48  | 1478.48   |
| 1400.76  | 1400.76   |
| 1332.74  | 1332.74   |
| 1257.86  | 1257.86   |
| 1159.91  | 1159.91   |
| 1073.88  | 1073.88   |
| 901.47   | 901.47    |
| 812.79   | 812.79    |
| 80.30    | 80.30     |
| 699.67   | 699.67    |
| 539.78   | 539.78    |
| 489.36   | 489.36    |
| 469.36   | 469.36    |
| 409.36   | 409.36    |

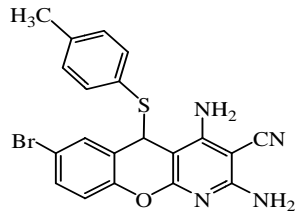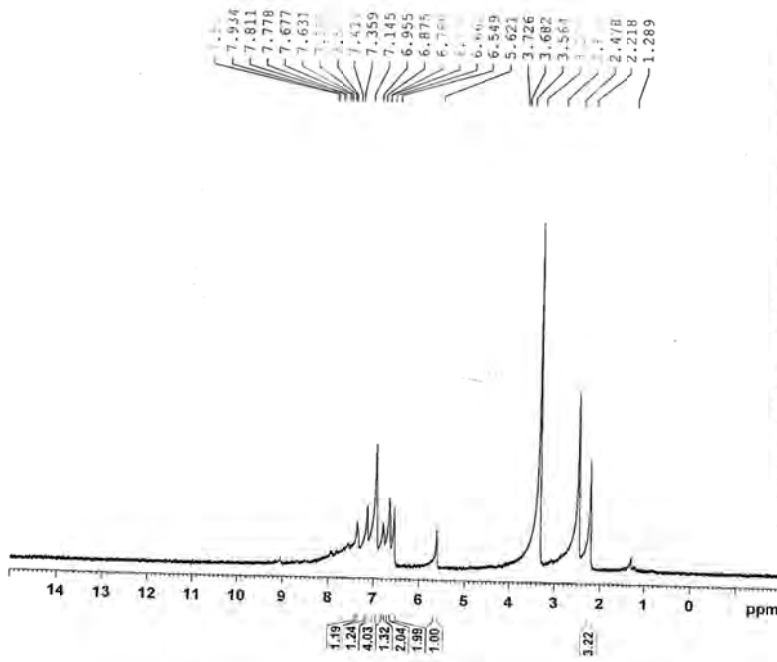

**BRUKER**

Current Data Parameters  
 NAME 3H  
 EXPNO 1073  
 PROCNO 1

F2 - Acquisition Parameters  
 Date\_ 20130715  
 Time 10.58  
 INSTRUM spect  
 PROBHD 5 mm Multinucl  
 FOLPROG zg  
 ID 32768  
 SOLVENT DMSO  
 NS 1  
 DS 0  
 SWH 11574.074 Hz  
 FIDRES 0.353213 Hz  
 AQ 1.4156276 sec  
 RG 382  
 DW 43.200 usec  
 DE 6.00 usec  
 TE 300.2 K  
 D1 5.00000000 sec

----- CHANNEL f1 -----  
 NUC1 1H  
 P1 9.00 usec  
 PL1 -6.00 dB  
 SFO1 400.1324710 MHz

F2 - Processing parameters  
 SI 32768  
 SF 400.1300045 MHz  
 WMW EM  
 SSB 0  
 LB 0.30 Hz  
 GB 0  
 PC 1.00

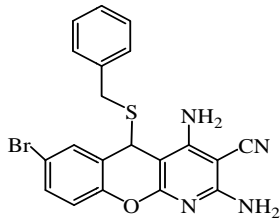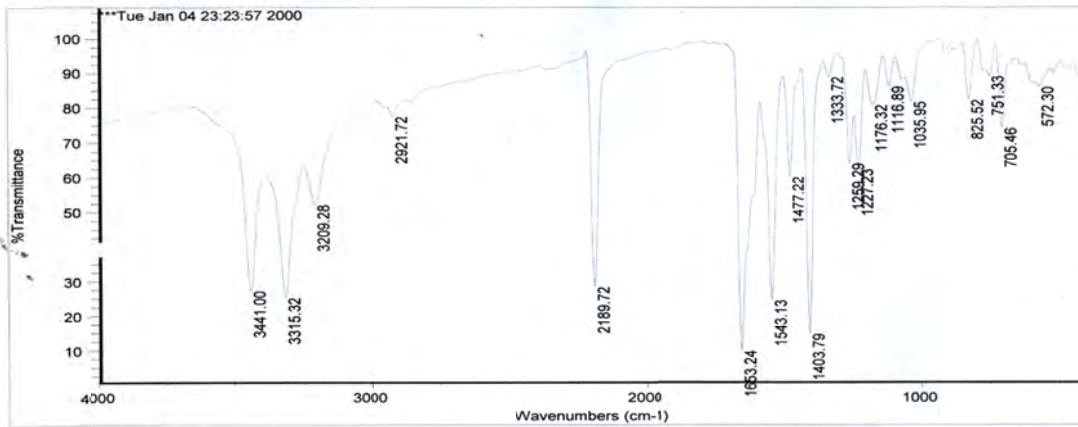

Wed Jan 05 01:16:41 2000

FIND PEAKS:

Spectrum: \*\*\*Tue Jan 04 23:23:57 2000  
 Region: 4000.00 400.00  
 Absolute threshold: 99.897  
 Sensitivity: 50

Peak list:

| Position | Intensity |
|----------|-----------|
| 1653.24  | 9.909     |
| 1403.79  | 14.758    |
| 1543.13  | 24.671    |
| 1477.22  | 60.227    |
| 2189.72  | 52.251    |
| 3209.28  | 52.251    |
| 1477.22  | 60.227    |

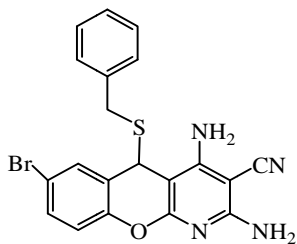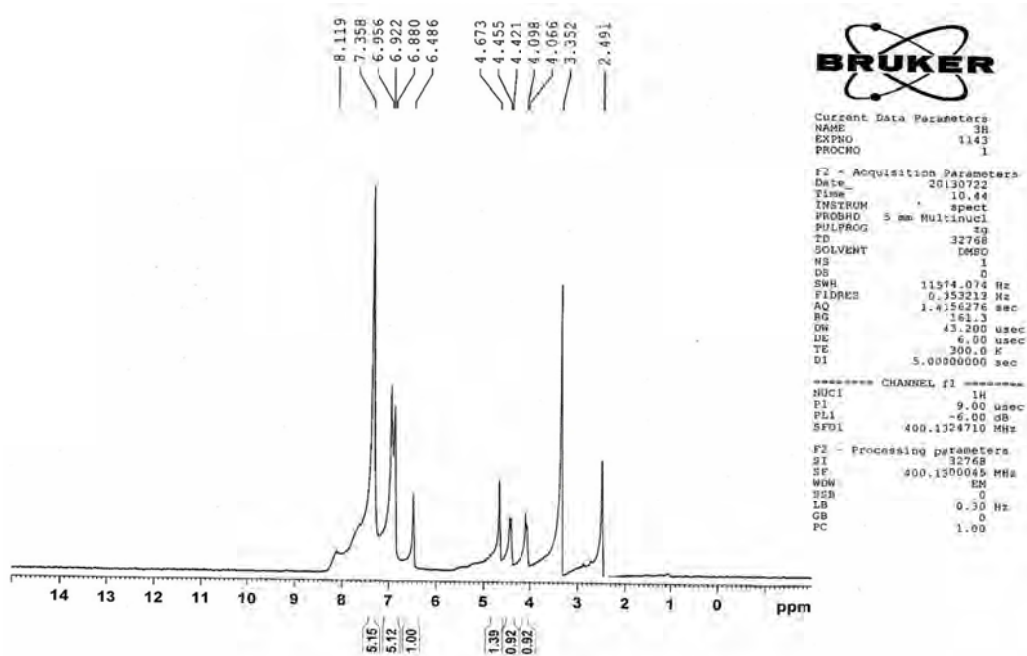



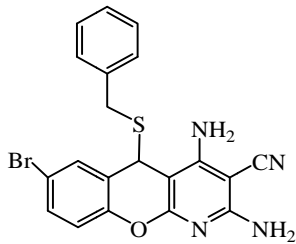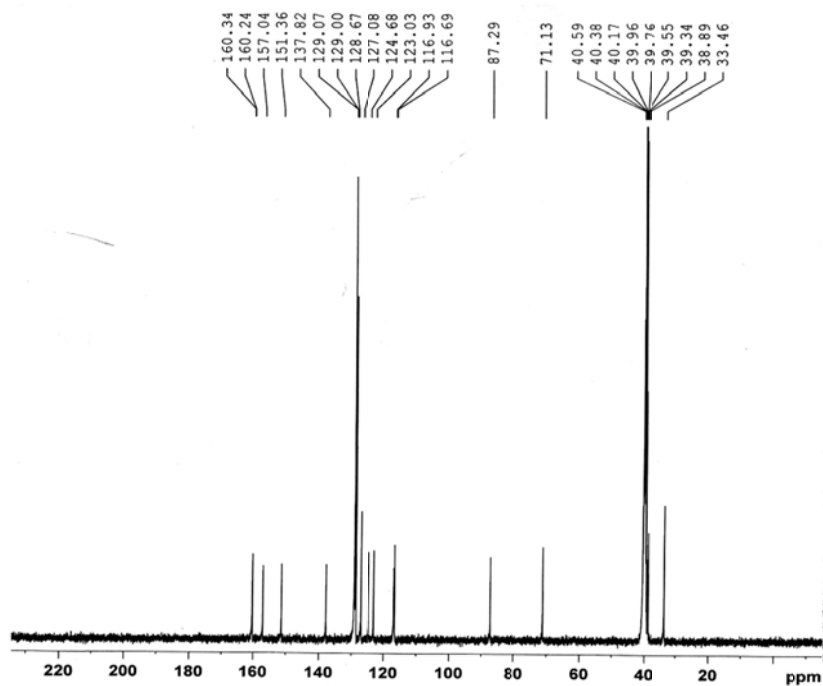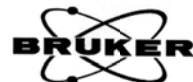

```

Current Data Parameters
NAME          Carbon13
EXPNO        2395
PROCNO       1

F2 - Acquisition Parameters
Date_        20130926
Time         1.20
INSTRUM     spect
PROBHD      5 mm Multinucl
PULPROG     zgpg30
TD          65536
SOLVENT     DMSO
NS          2000
DS          4
SWH         40404.039 Hz
FIDRES     0.616517 Hz
AQ         0.8110580 sec
RG         32768
DW         12.375 usec
DE         6.00 usec
TE         300.0 K
d1         1.0000000 sec
d11        0.0300000 sec
d12        0.0000200 sec

===== CHANNEL f1 =====
NUC1        13C
P1         7.50 usec
PL1        -2.00 dB
SFO1       100.6204965 MHz

===== CHANNEL f2 =====
CPDPRG2    waltz16
NUC2        1H
PCPD2      80.00 usec
PL2        -4.00 dB
PL12       18.50 dB
PL13       18.50 dB
SFO2       400.1316005 MHz

F2 - Processing parameters
SI         32768
SF         100.6127690 MHz
WDW        EM
SSB        0
LB         1.00 Hz
GB         0
PC         1.40

```

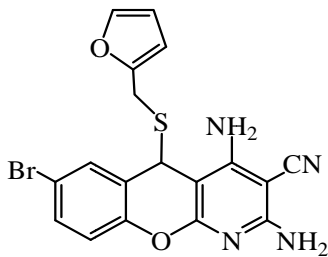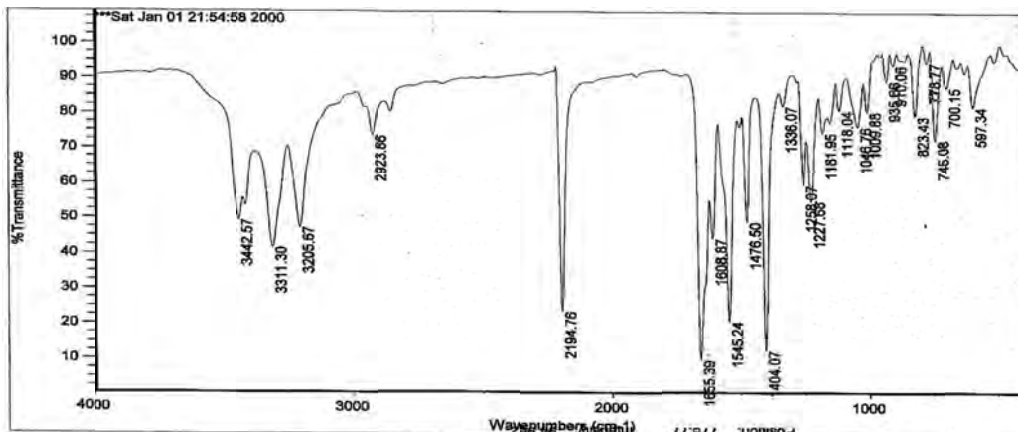

Sat Jan 01 22:02:43 2000

FIND PEAKS:

Spectrum: \*\*\*\*Sat Jan 01 21:54:58 2000  
 Region: 4000.00 400.00  
 Absolute threshold: 100.724  
 Sensitivity: 50  
 Peak list:

| Position | Intensity |
|----------|-----------|
| 1655.39  | 9.843     |
| 1404.07  | 12.614    |
| 1545.24  | 21.074    |
| 2194.76  | 23.631    |
| 3311.30  | 41.589    |
| 1608.87  | 44.979    |
| 3205.67  | 47.418    |

| Position | Intensity |
|----------|-----------|
| 49.275   | 49.432    |
| 82.305   | 80.973    |
| 82.658   | 79.789    |
| 76.659   | 78.789    |
| 74.965   | 76.659    |
| 73.710   | 74.965    |
| 72.936   | 72.936    |
| 58.914   | 58.914    |
| 55.269   | 55.269    |
| 49.432   | 49.432    |
| 1476.50  | 1476.50   |
| 1476.50  | 1476.50   |
| 1009.88  | 1009.88   |
| 1118.04  | 1118.04   |
| 597.34   | 597.34    |
| 1338.07  | 1338.07   |
| 700.15   | 700.15    |
| 823.43   | 823.43    |
| 810.09   | 810.09    |
| 775.77   | 775.77    |

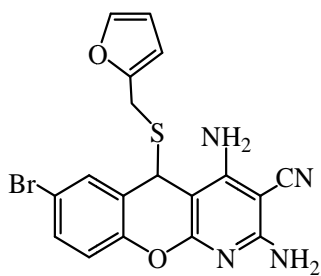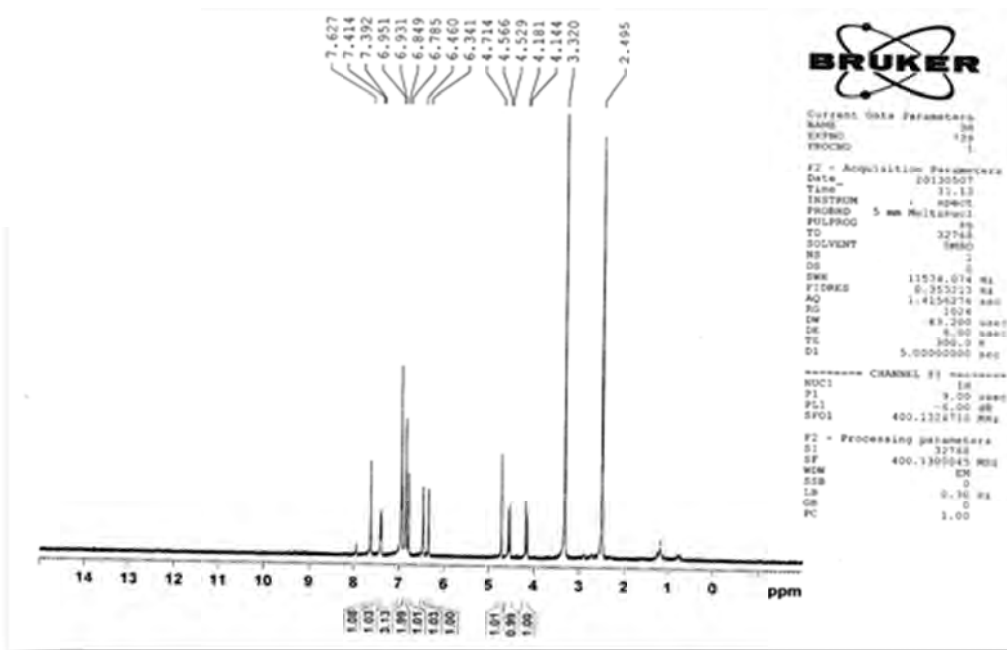

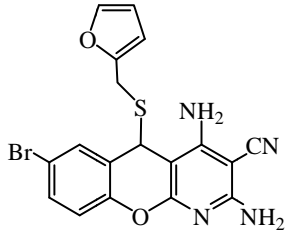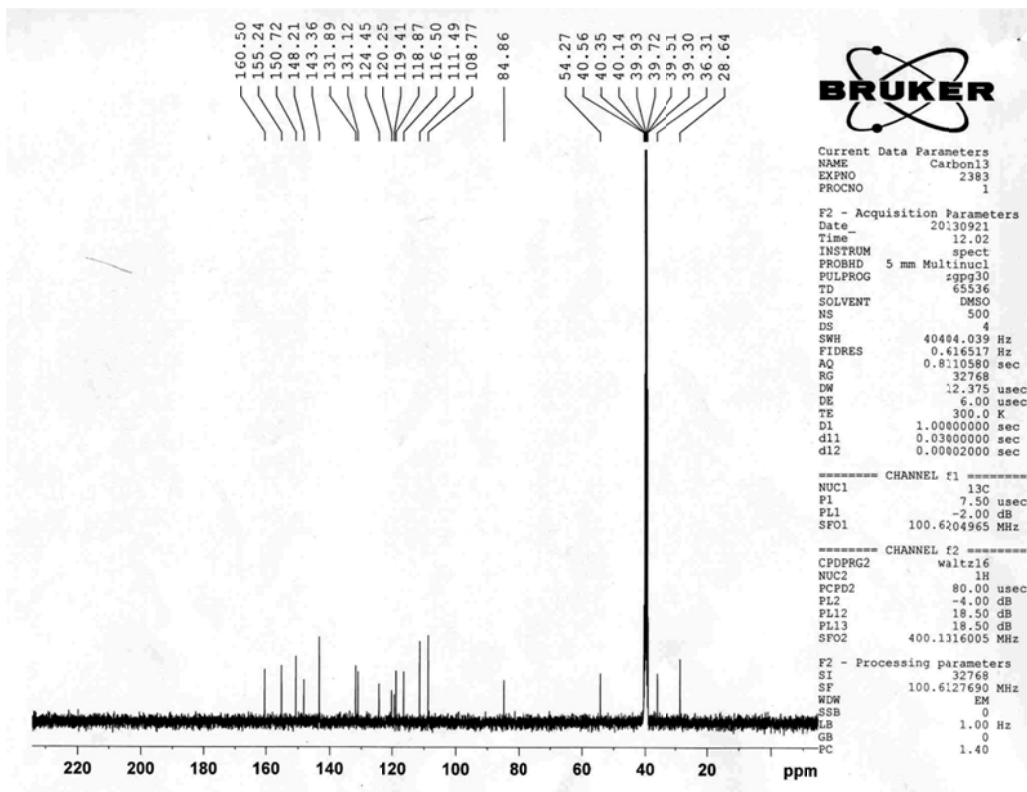

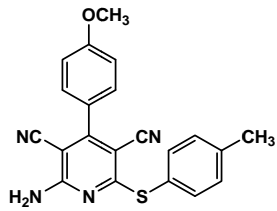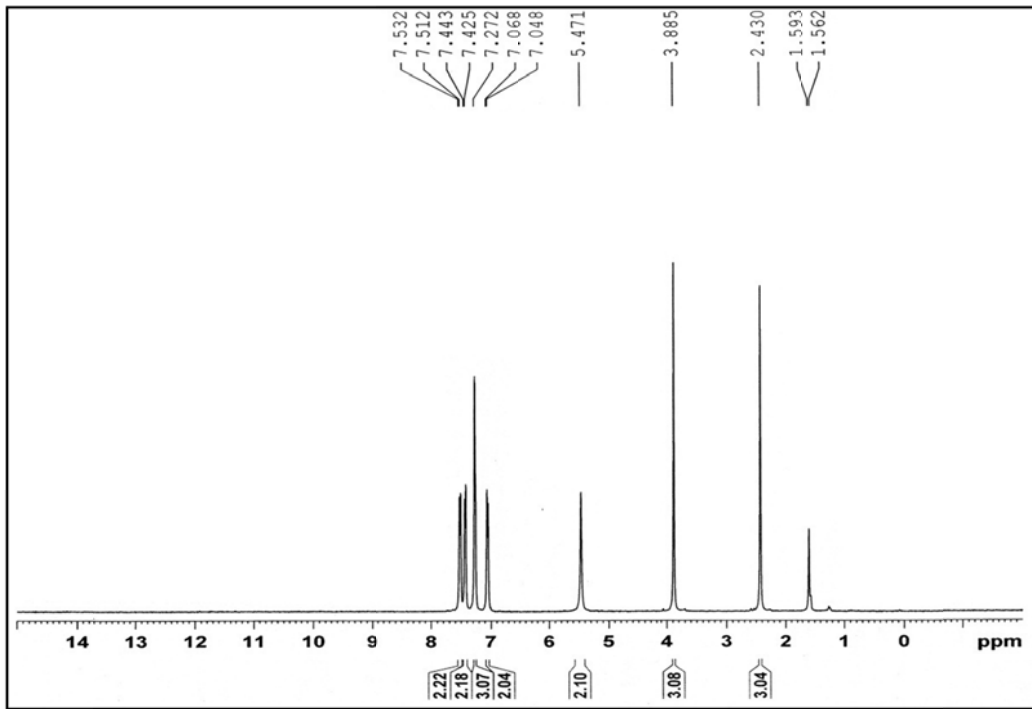

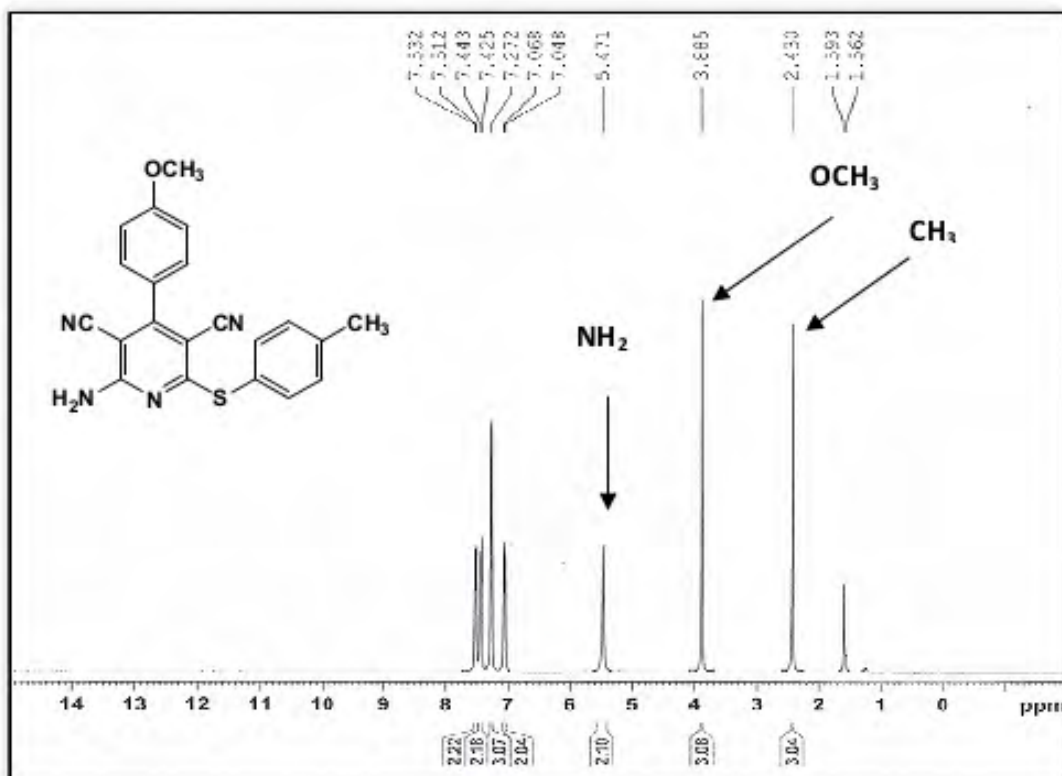

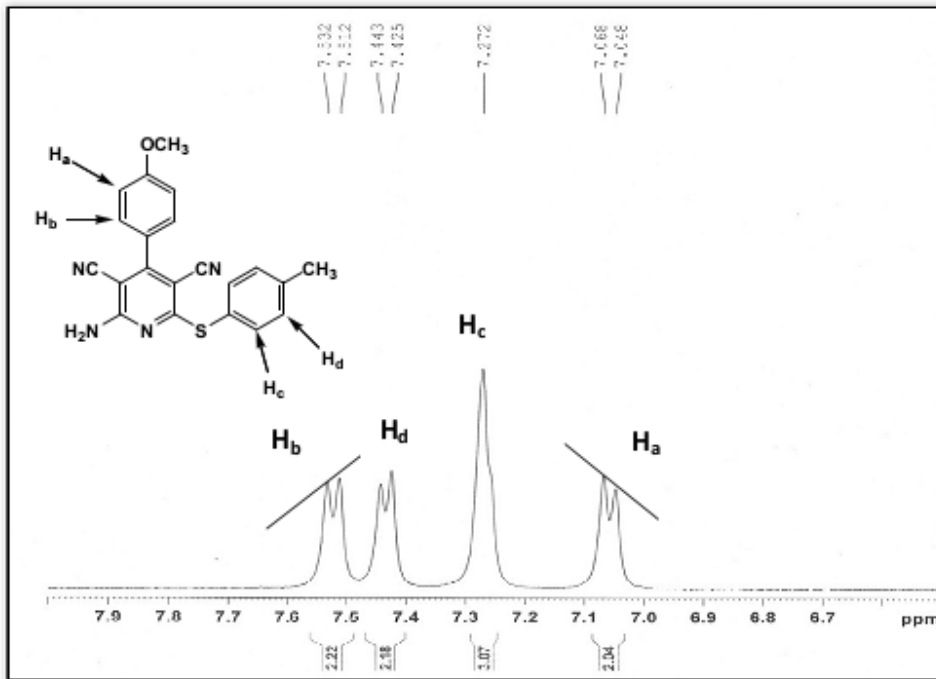

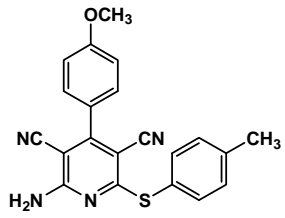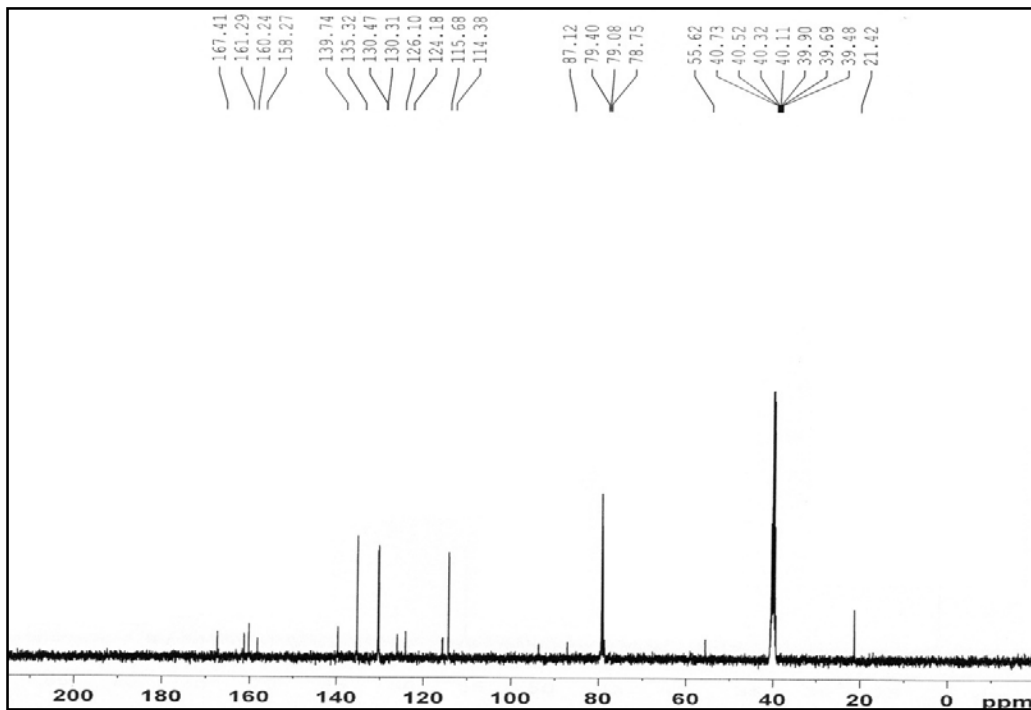



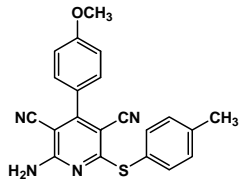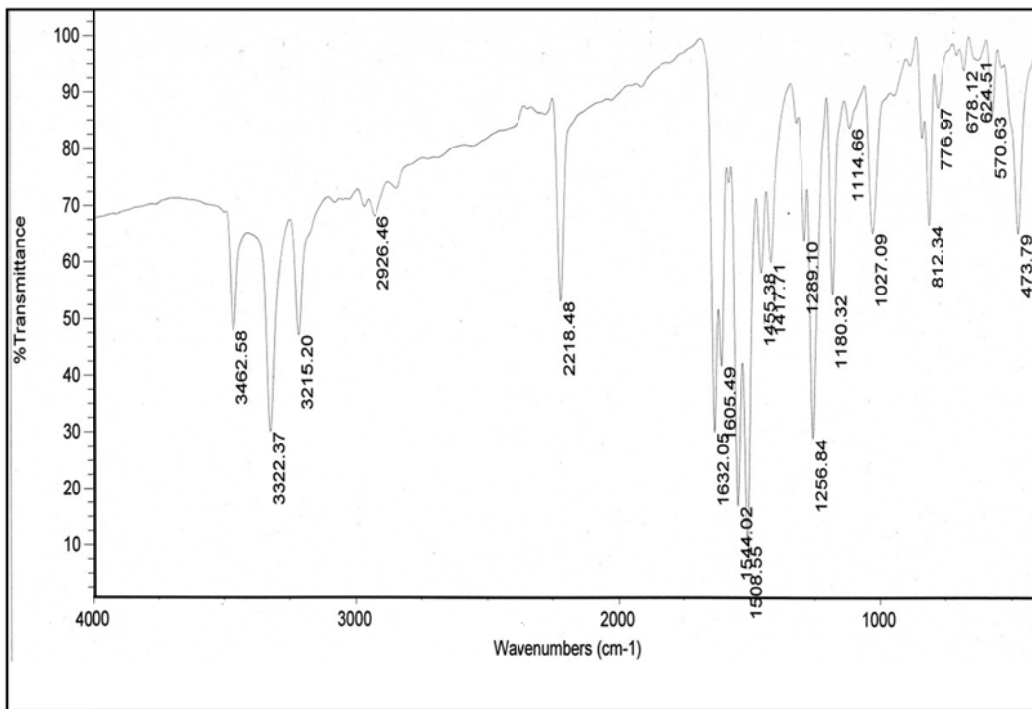

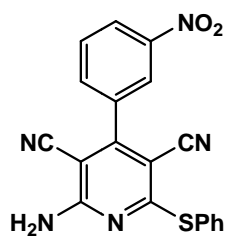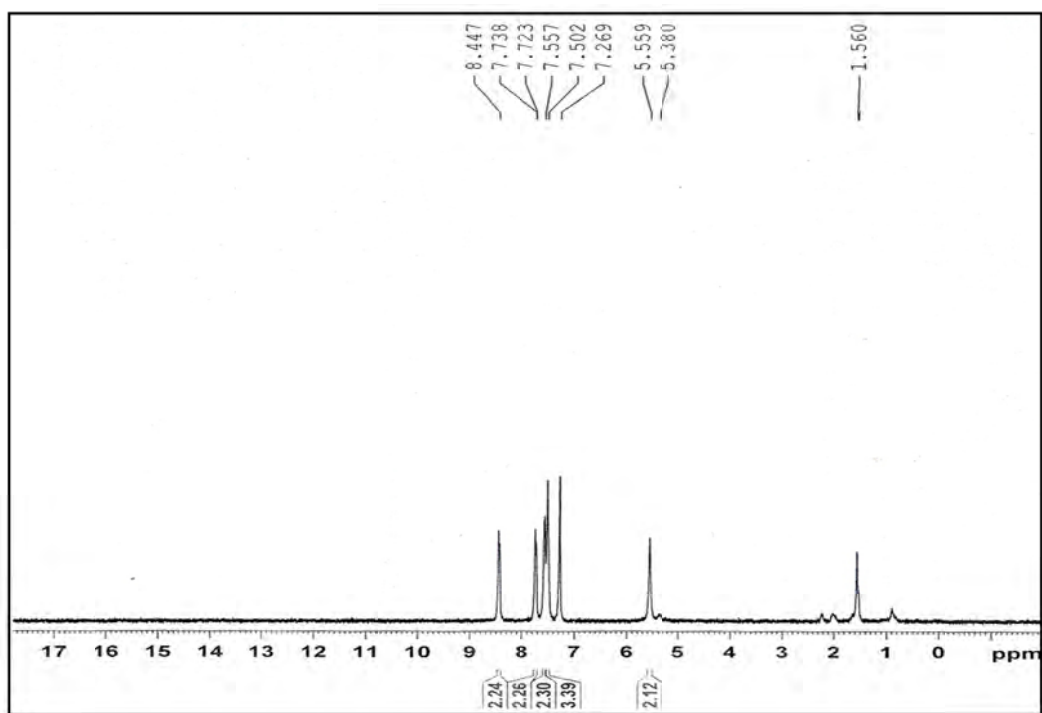

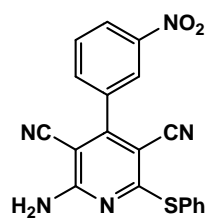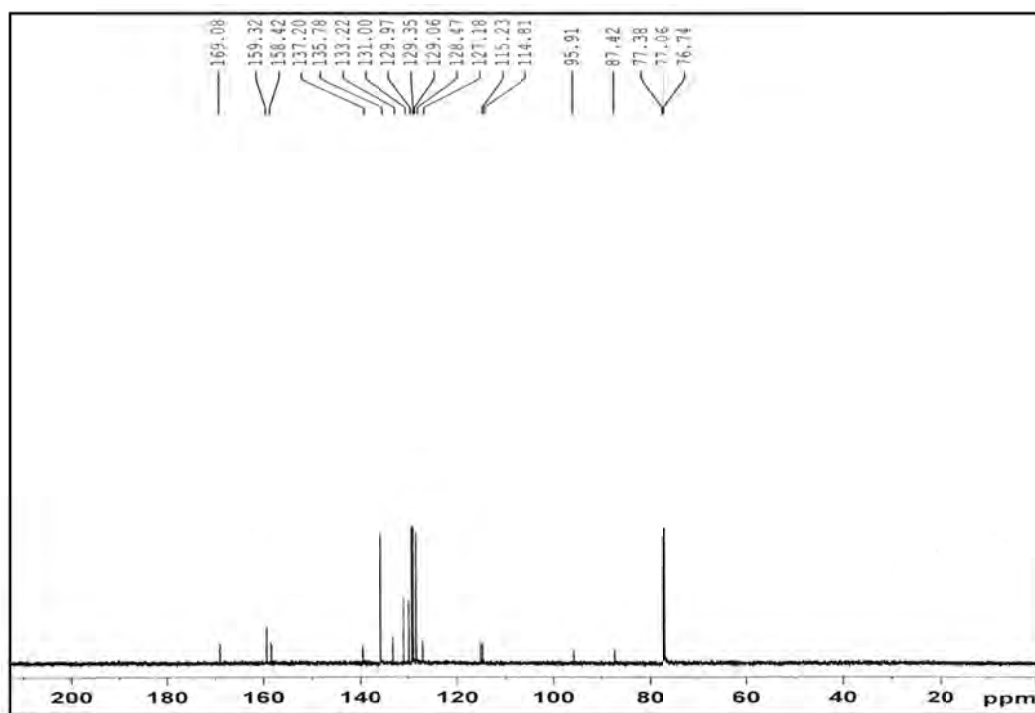

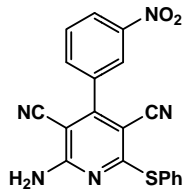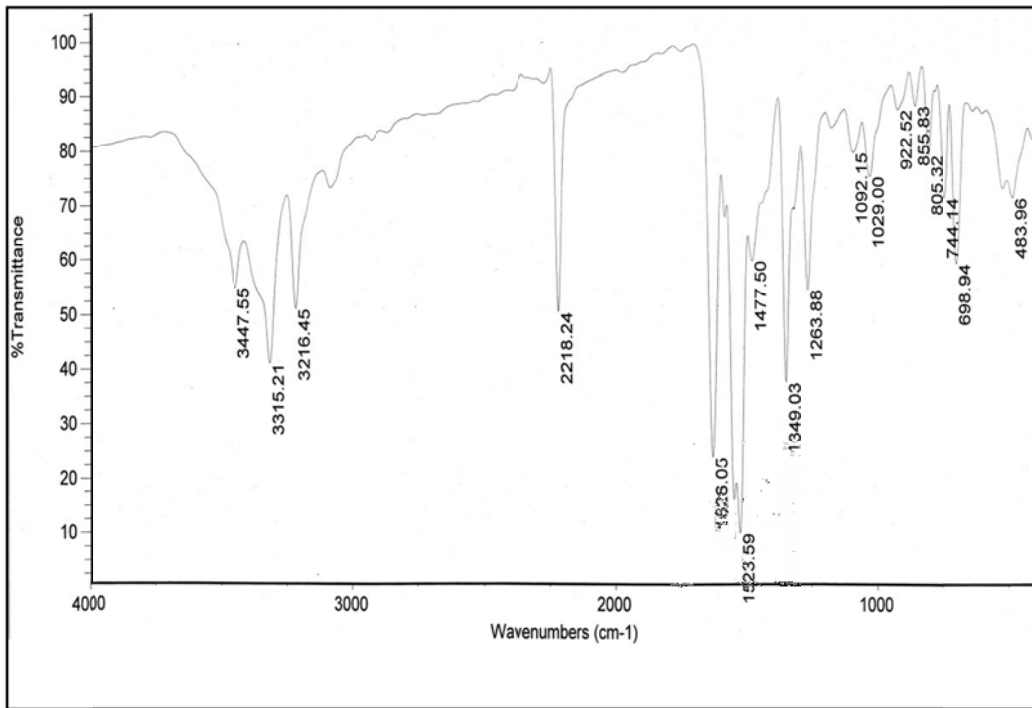

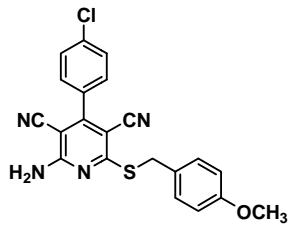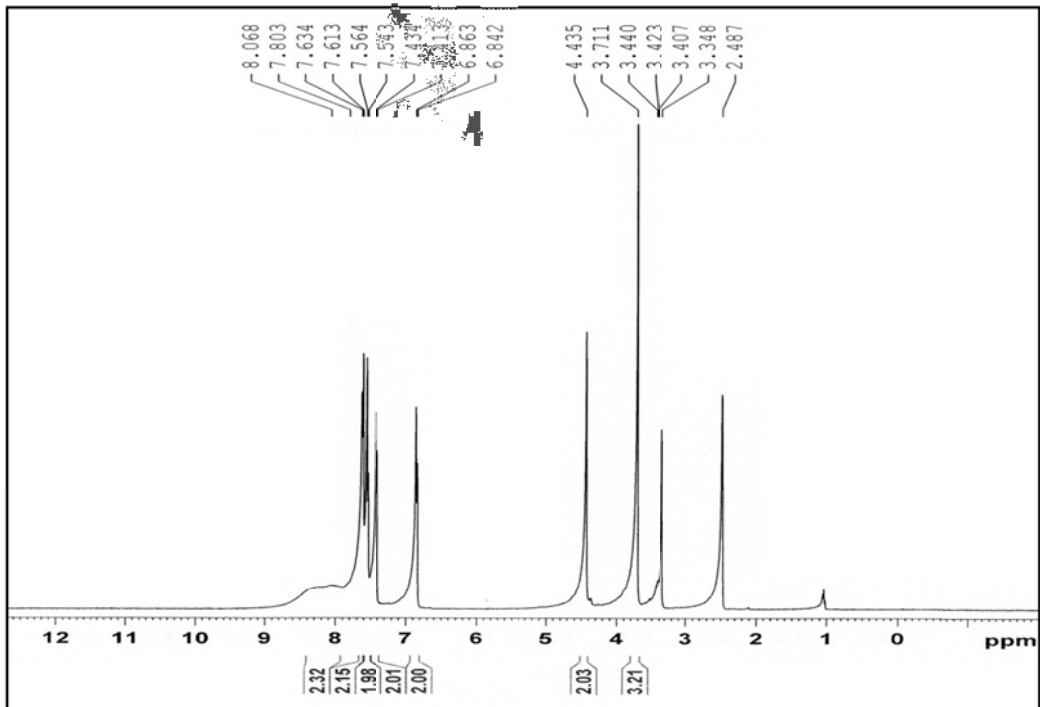

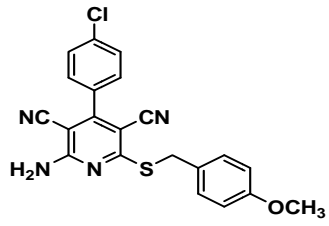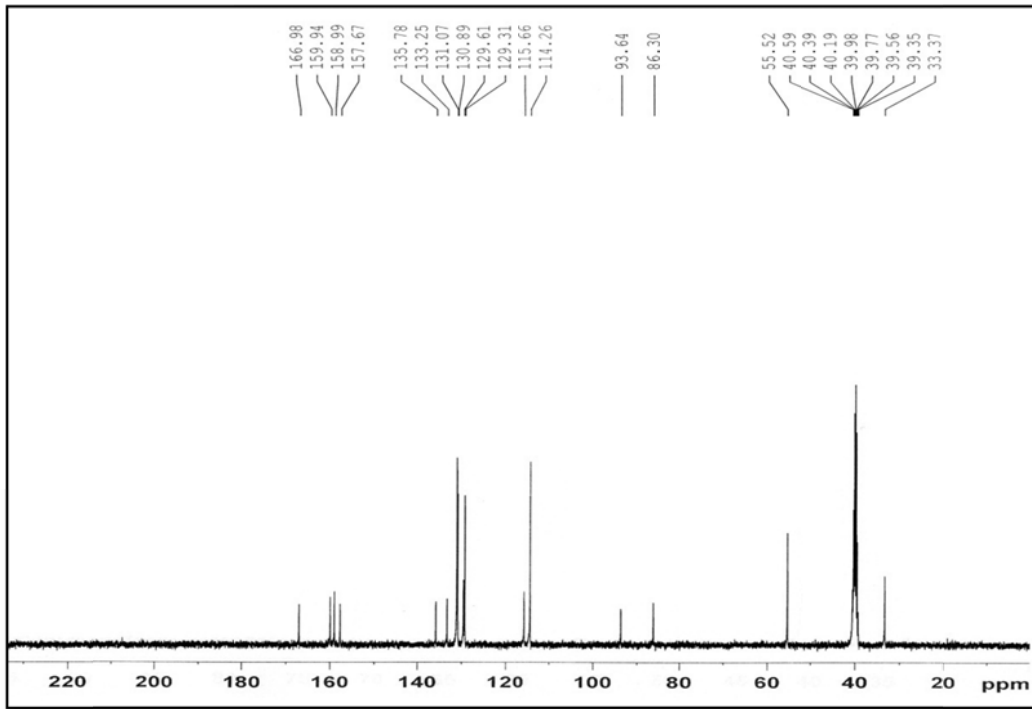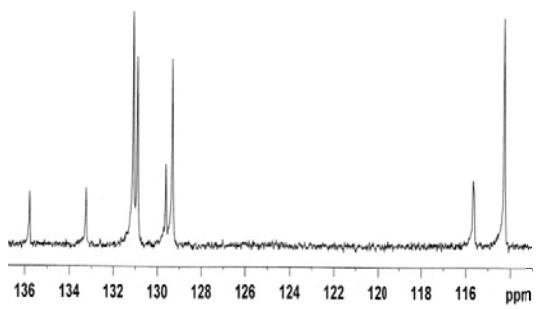

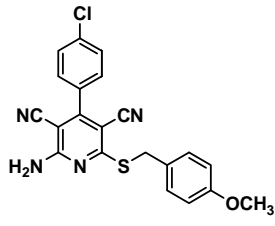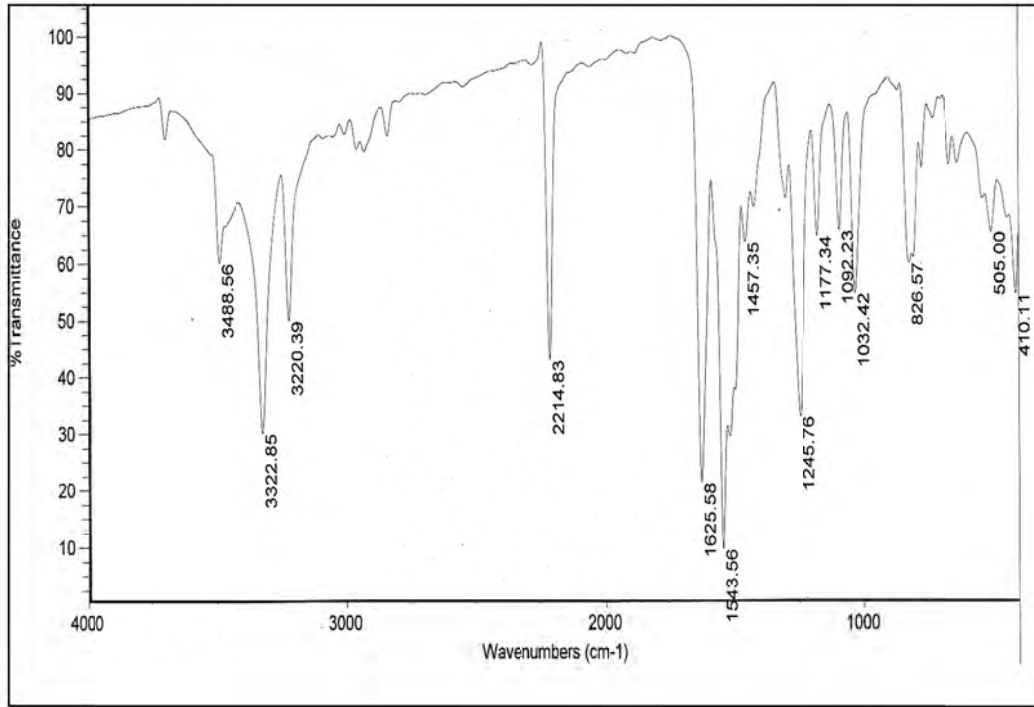

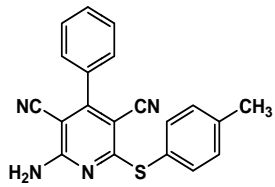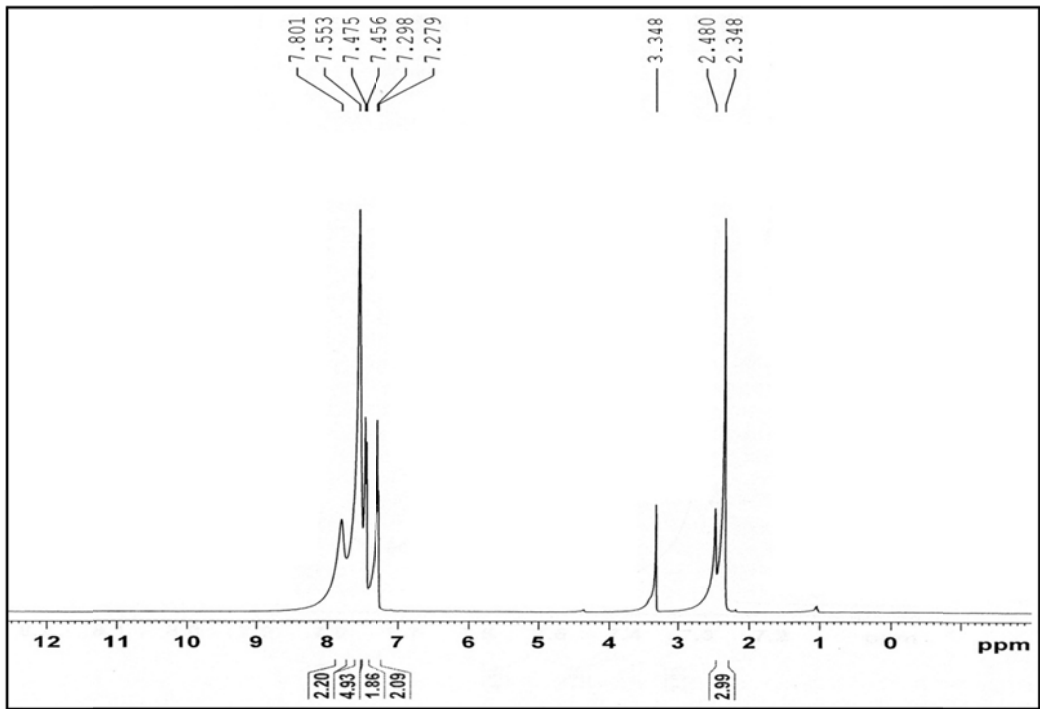



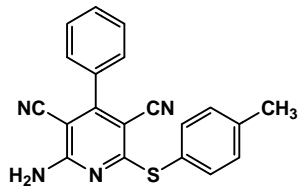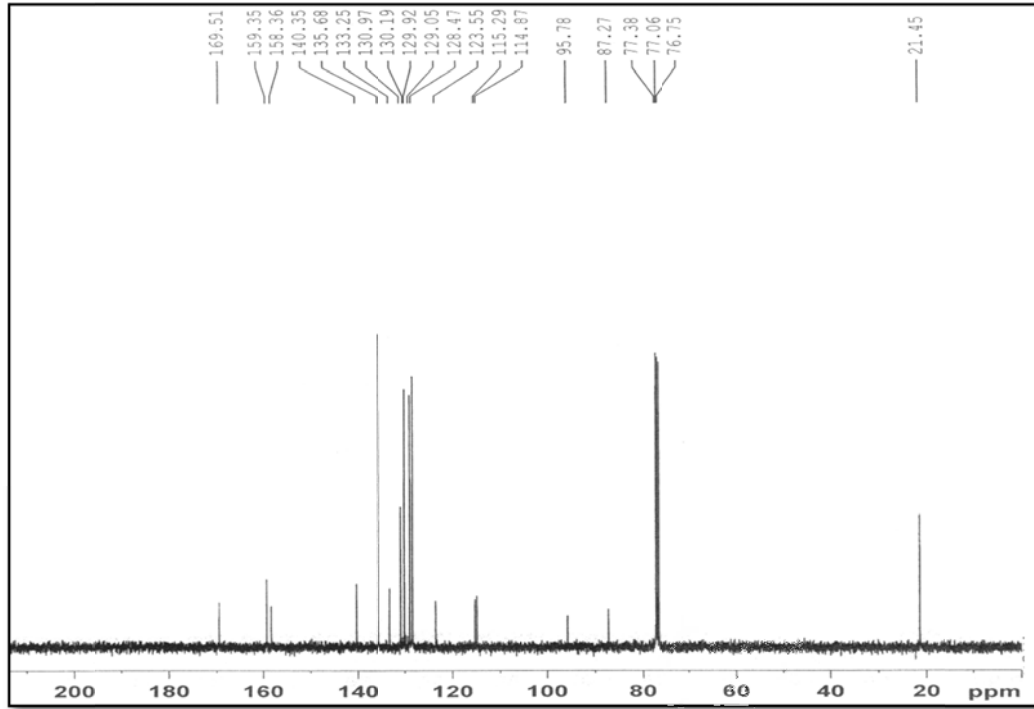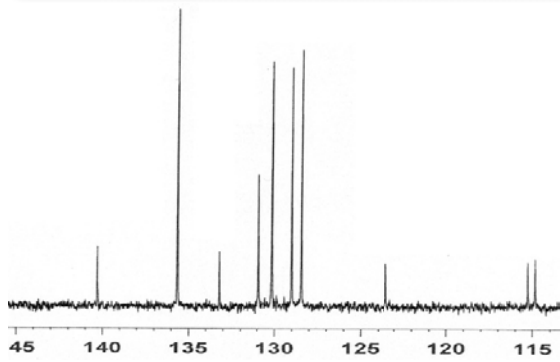

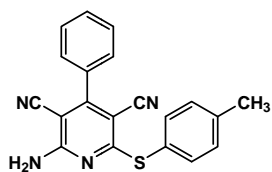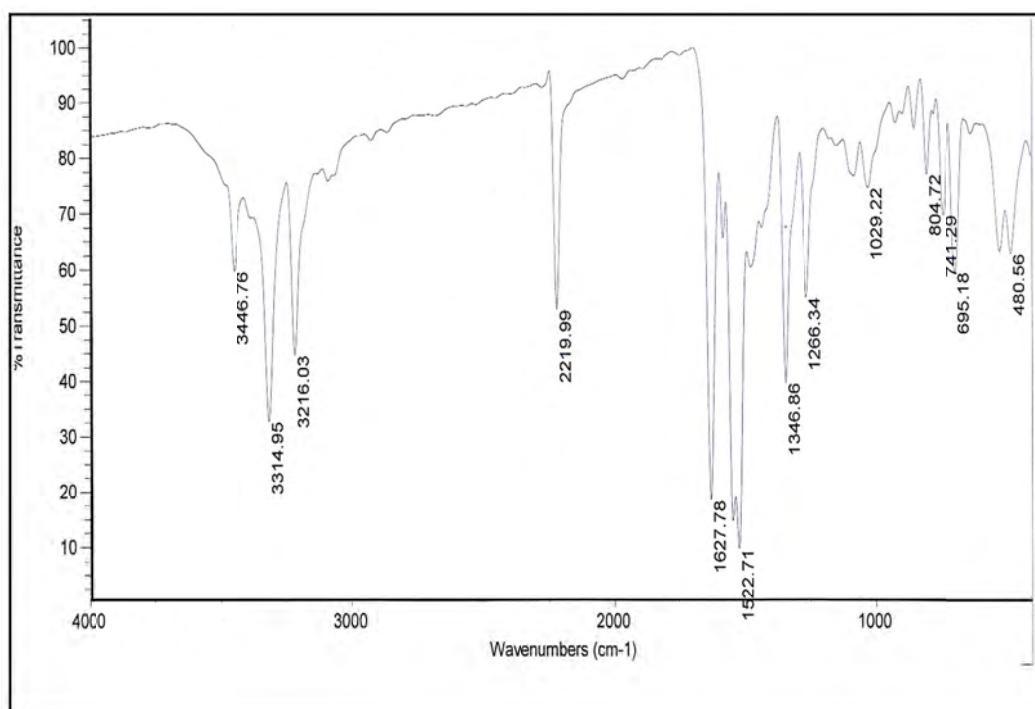

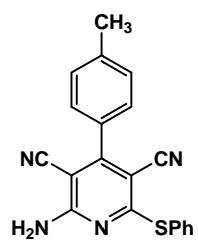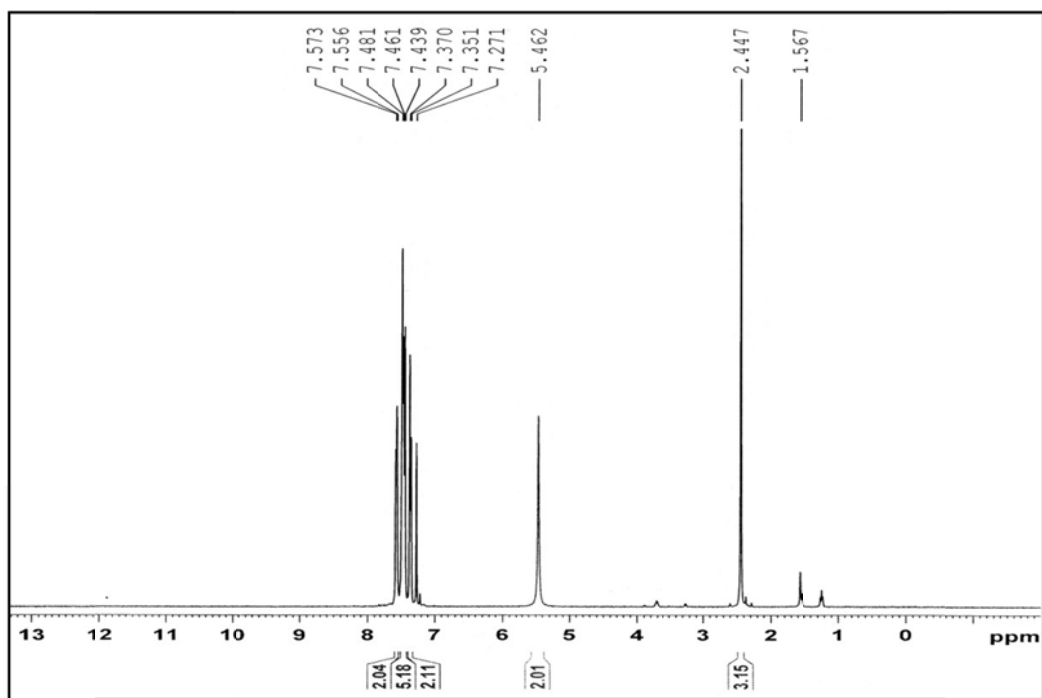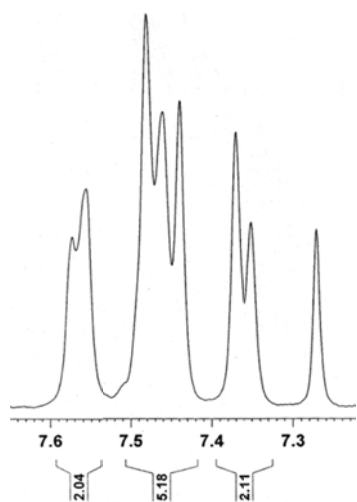

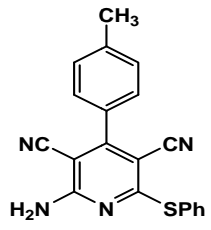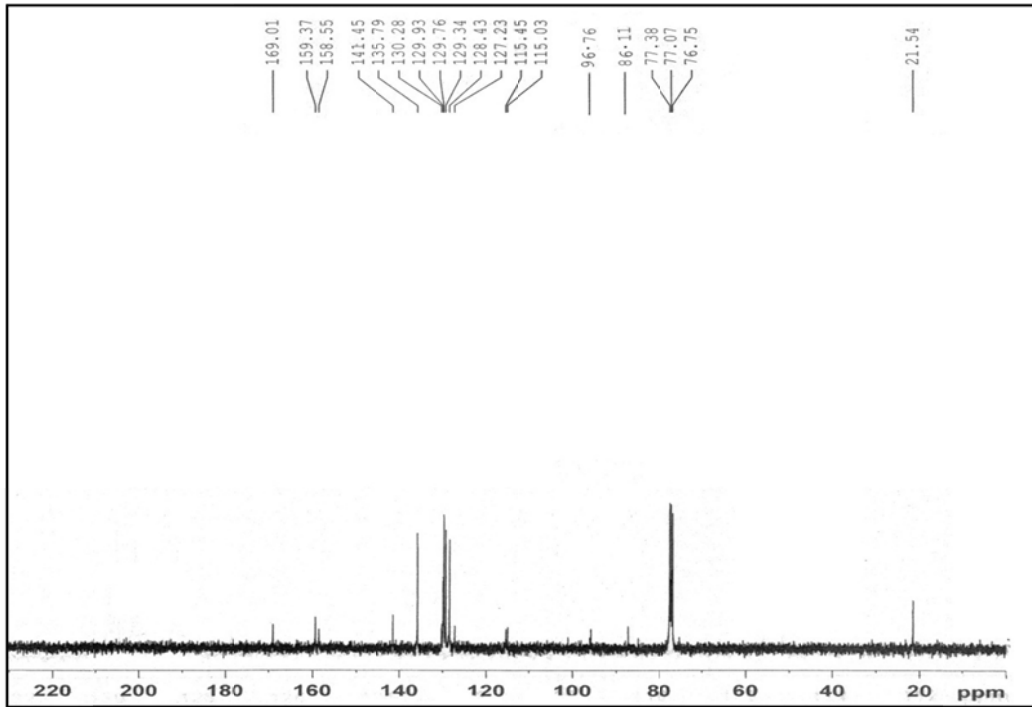

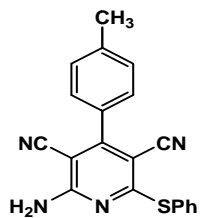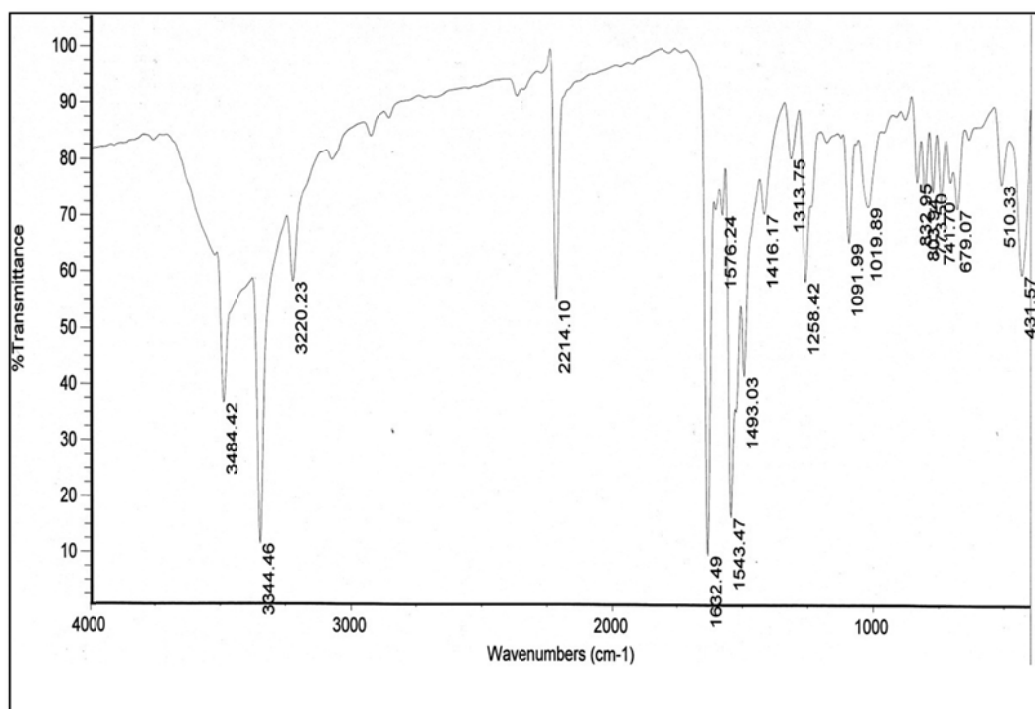

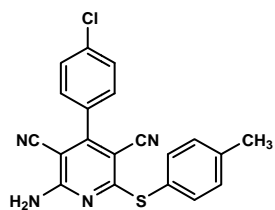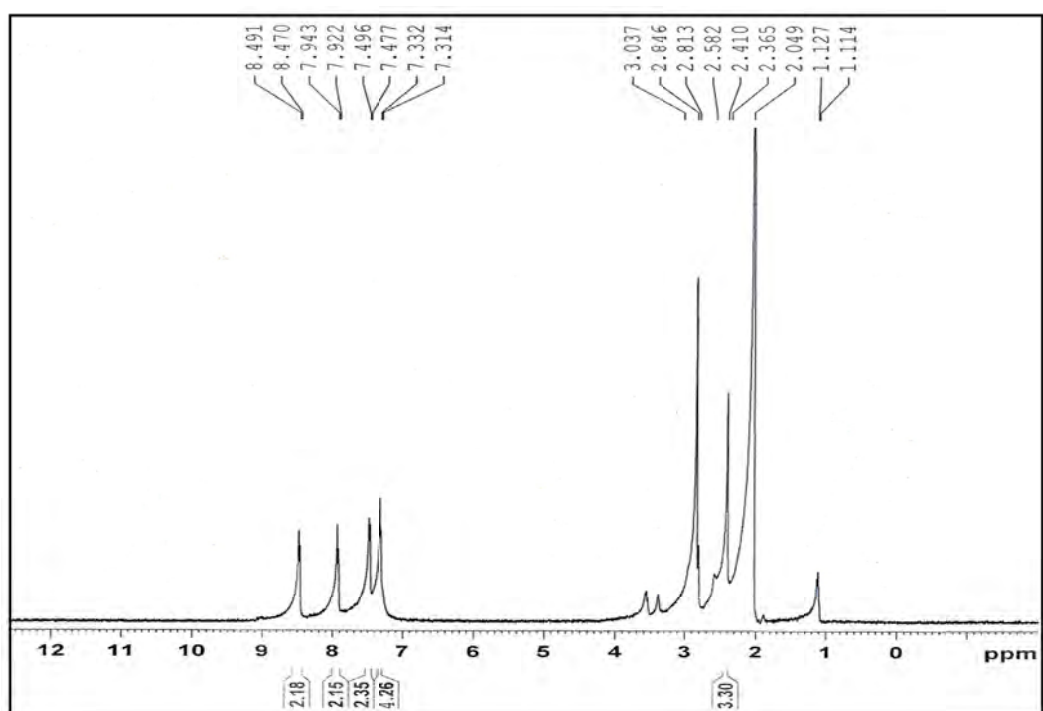

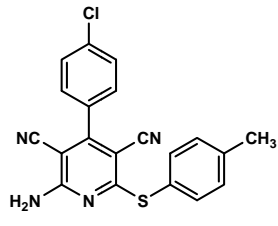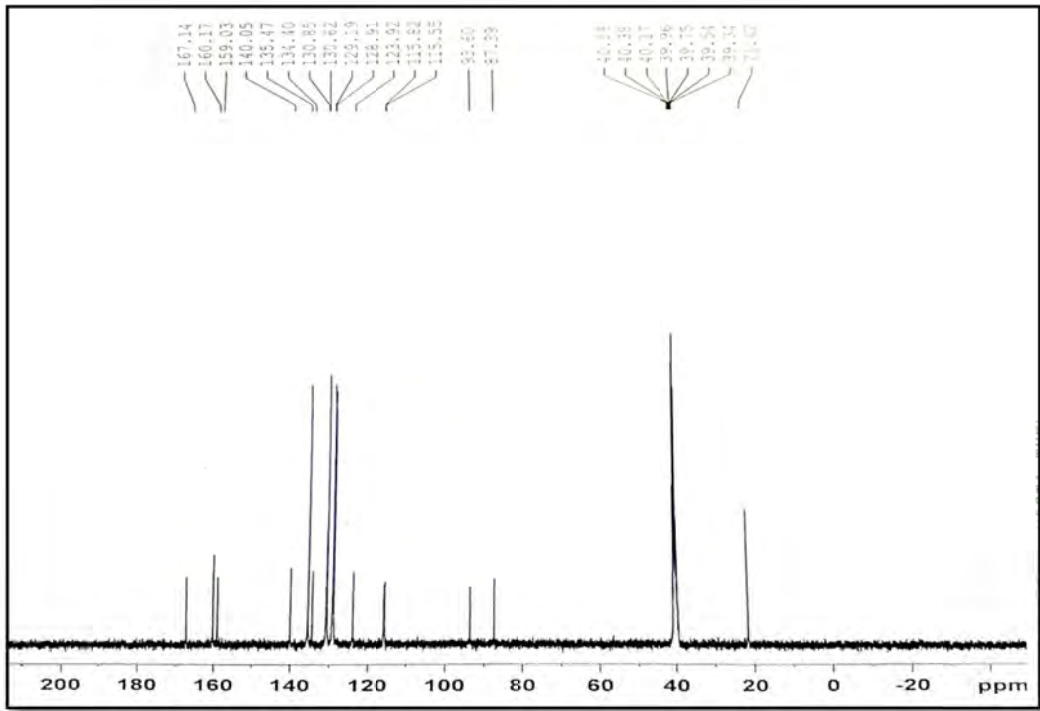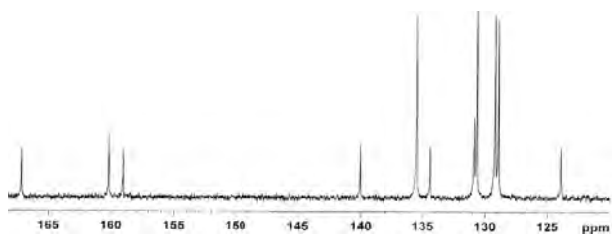

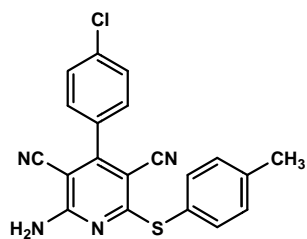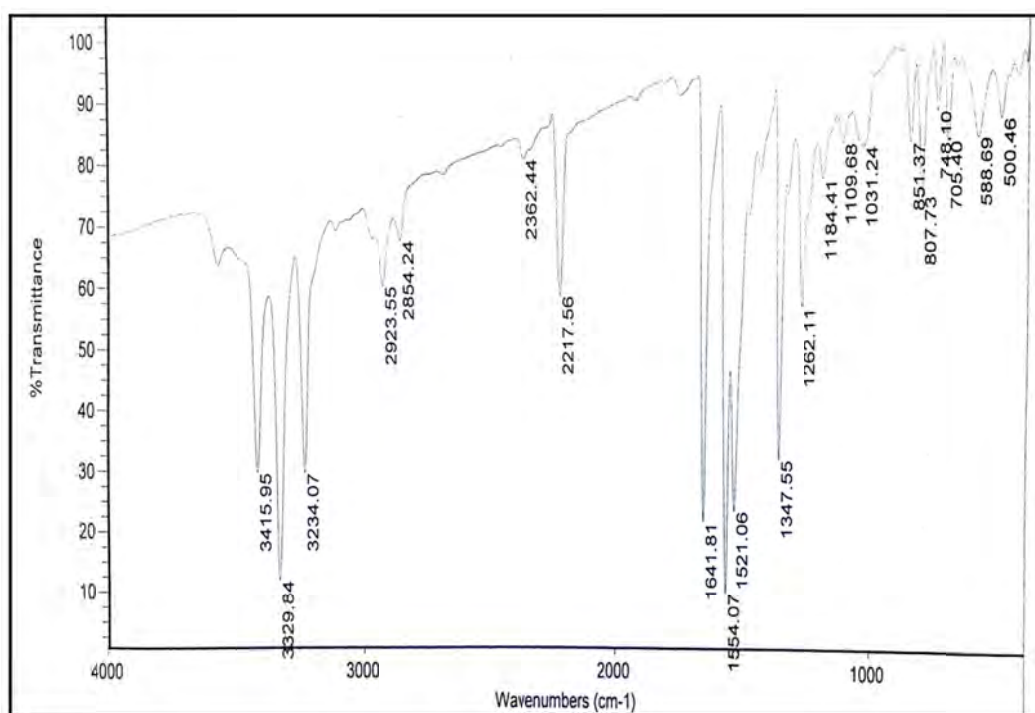



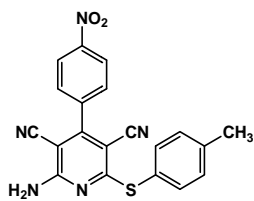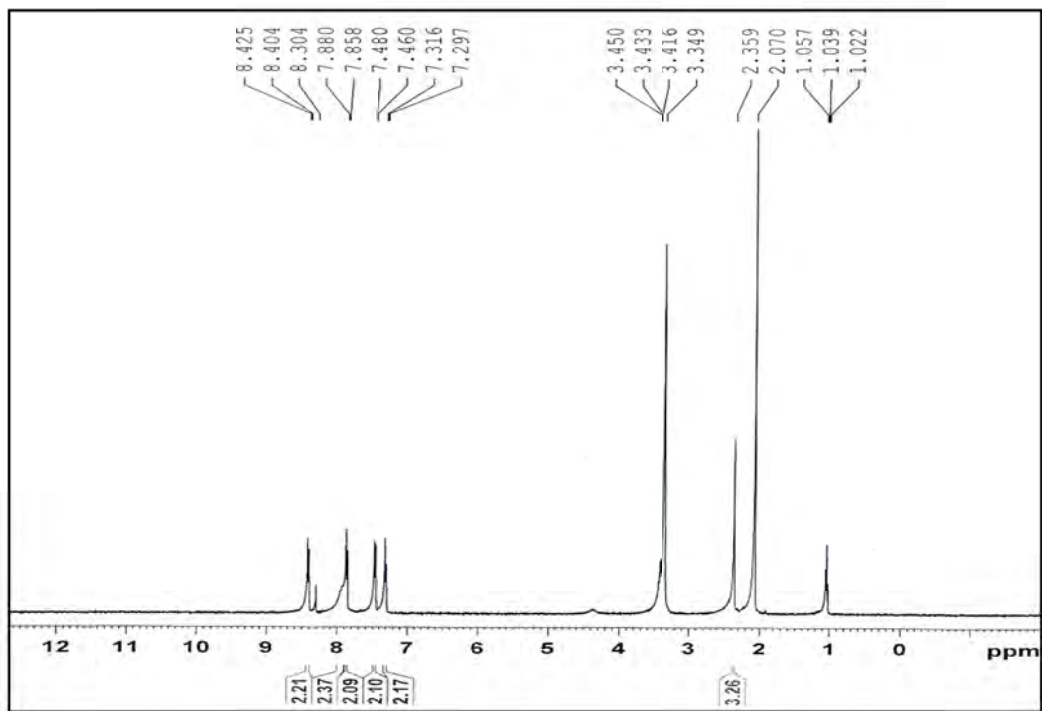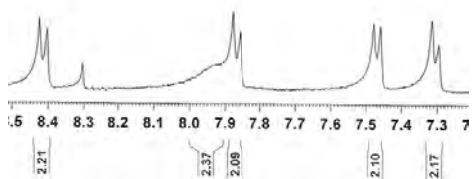

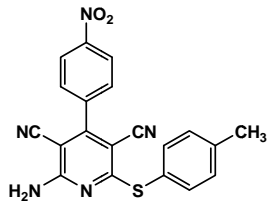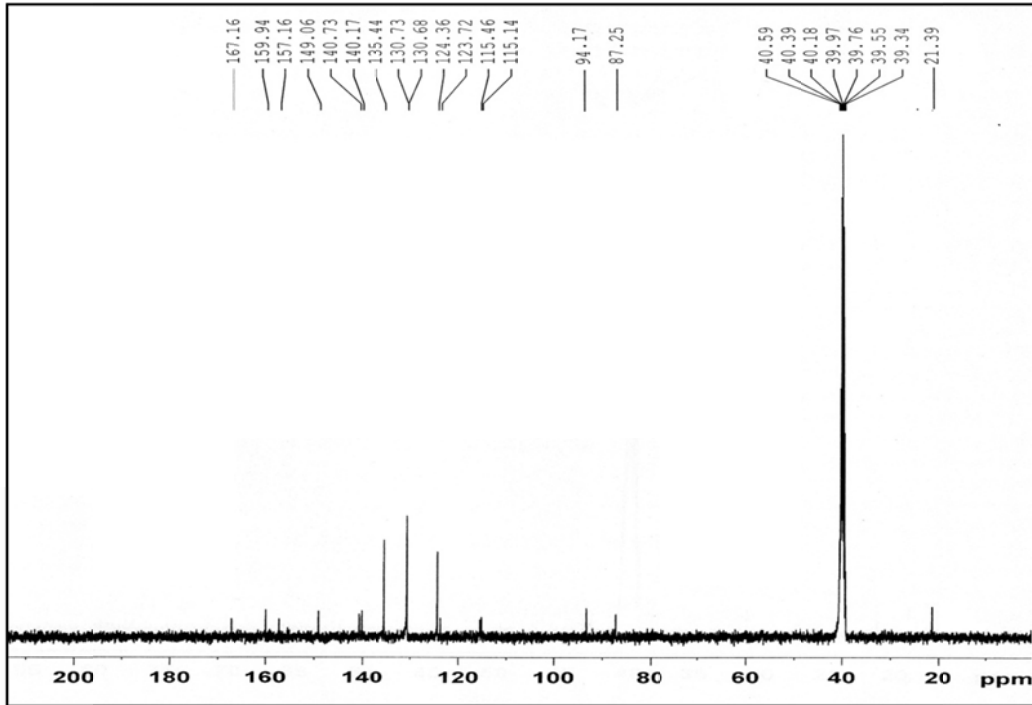

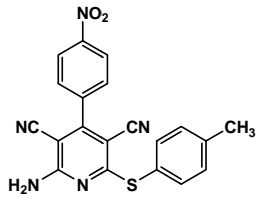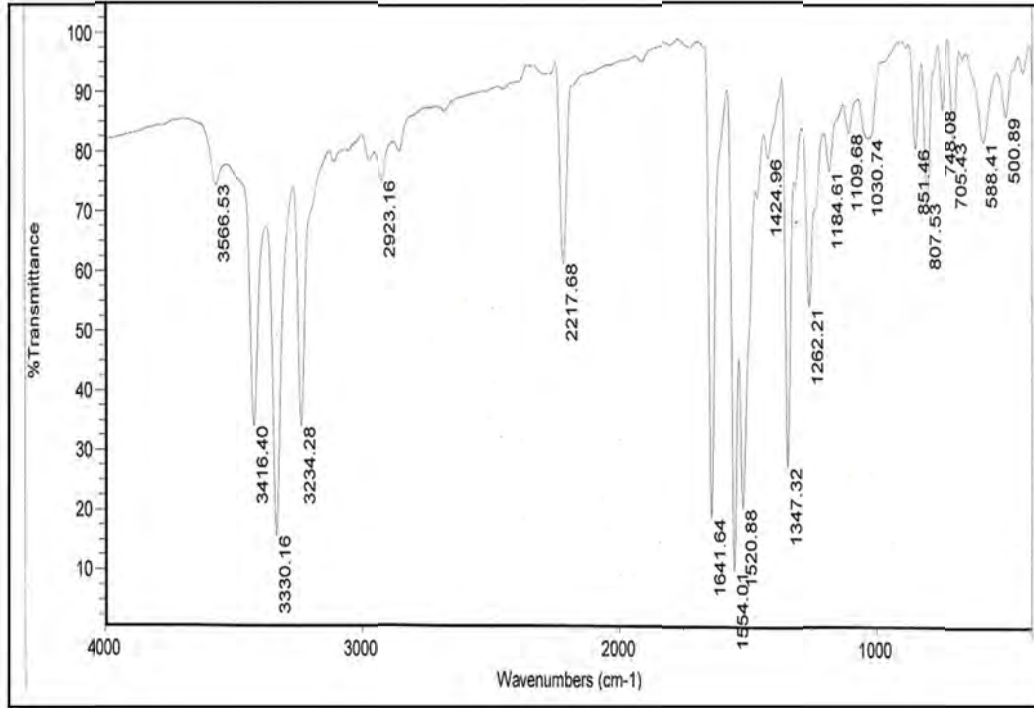

Supplement: c4ra04769a1.pdf [file c4ra04769a1.pdf]
